# Supplementary material
Source: MDPI journal article supplement (https://www.mdpi.com/2071-1050/13/19/10508)
Supplement: s1 [file s1]

Archive with 28 entries (28 files):
- Figure S1.tif
- Figure S10.tif
- Figure S11.tif
- Figure S12.tif
- Figure S2.tif
- Figure S3.tif
- Figure S4.tif
- Figure S5.tif
- Figure S6.tif
- Figure S7.tif
- Figure S8.tif
- Figure S9.tif
- Supplementary S1.pdf
- Table S1.pdf
- Table S10.pdf
- Table S11.pdf
- Table S12.pdf
- Table S13.pdf
- Table S14.pdf
- Table S15.pdf
- Table S2.pdf
- Table S3.pdf
- Table S4.pdf
- Table S5.pdf
- Table S6.pdf
- Table S7.pdf
- Table S8.pdf
- Table S9.pdf
