# Supplementary material
Source: MDPI journal article supplement (https://www.mdpi.com/2071-1050/13/19/10508)

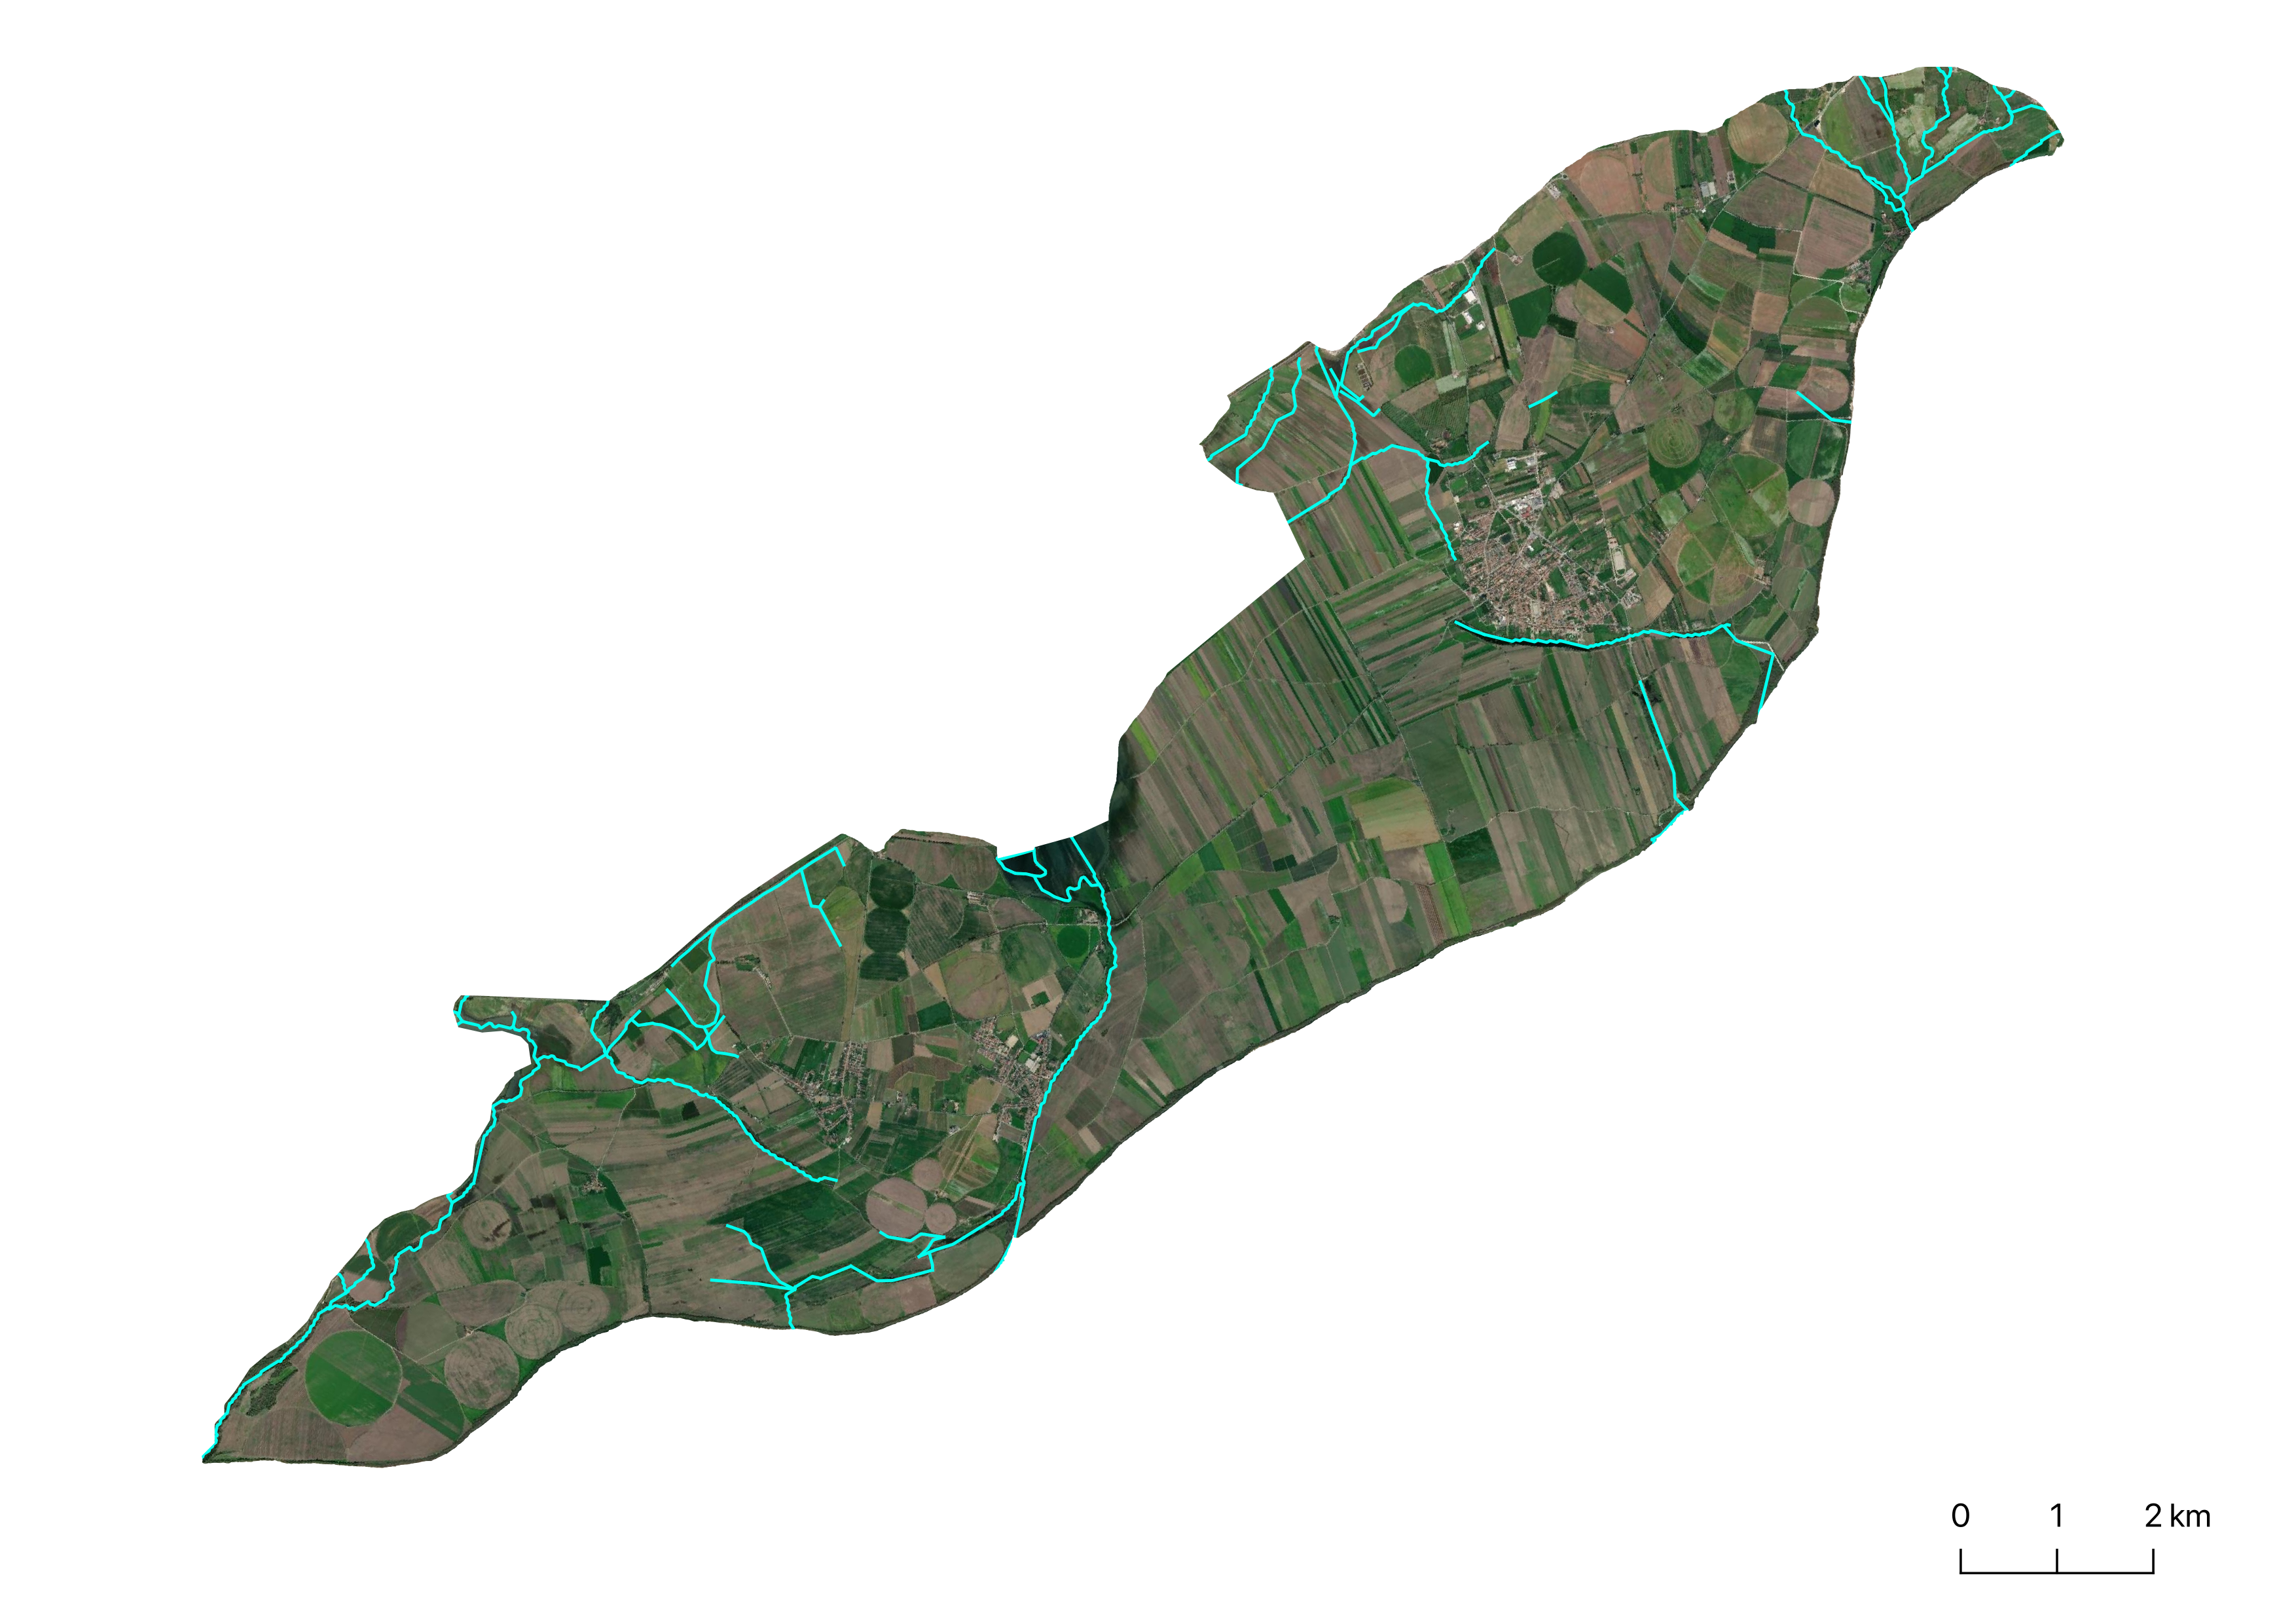

Supplement: s1 [file s1 › Figure S1.tif]

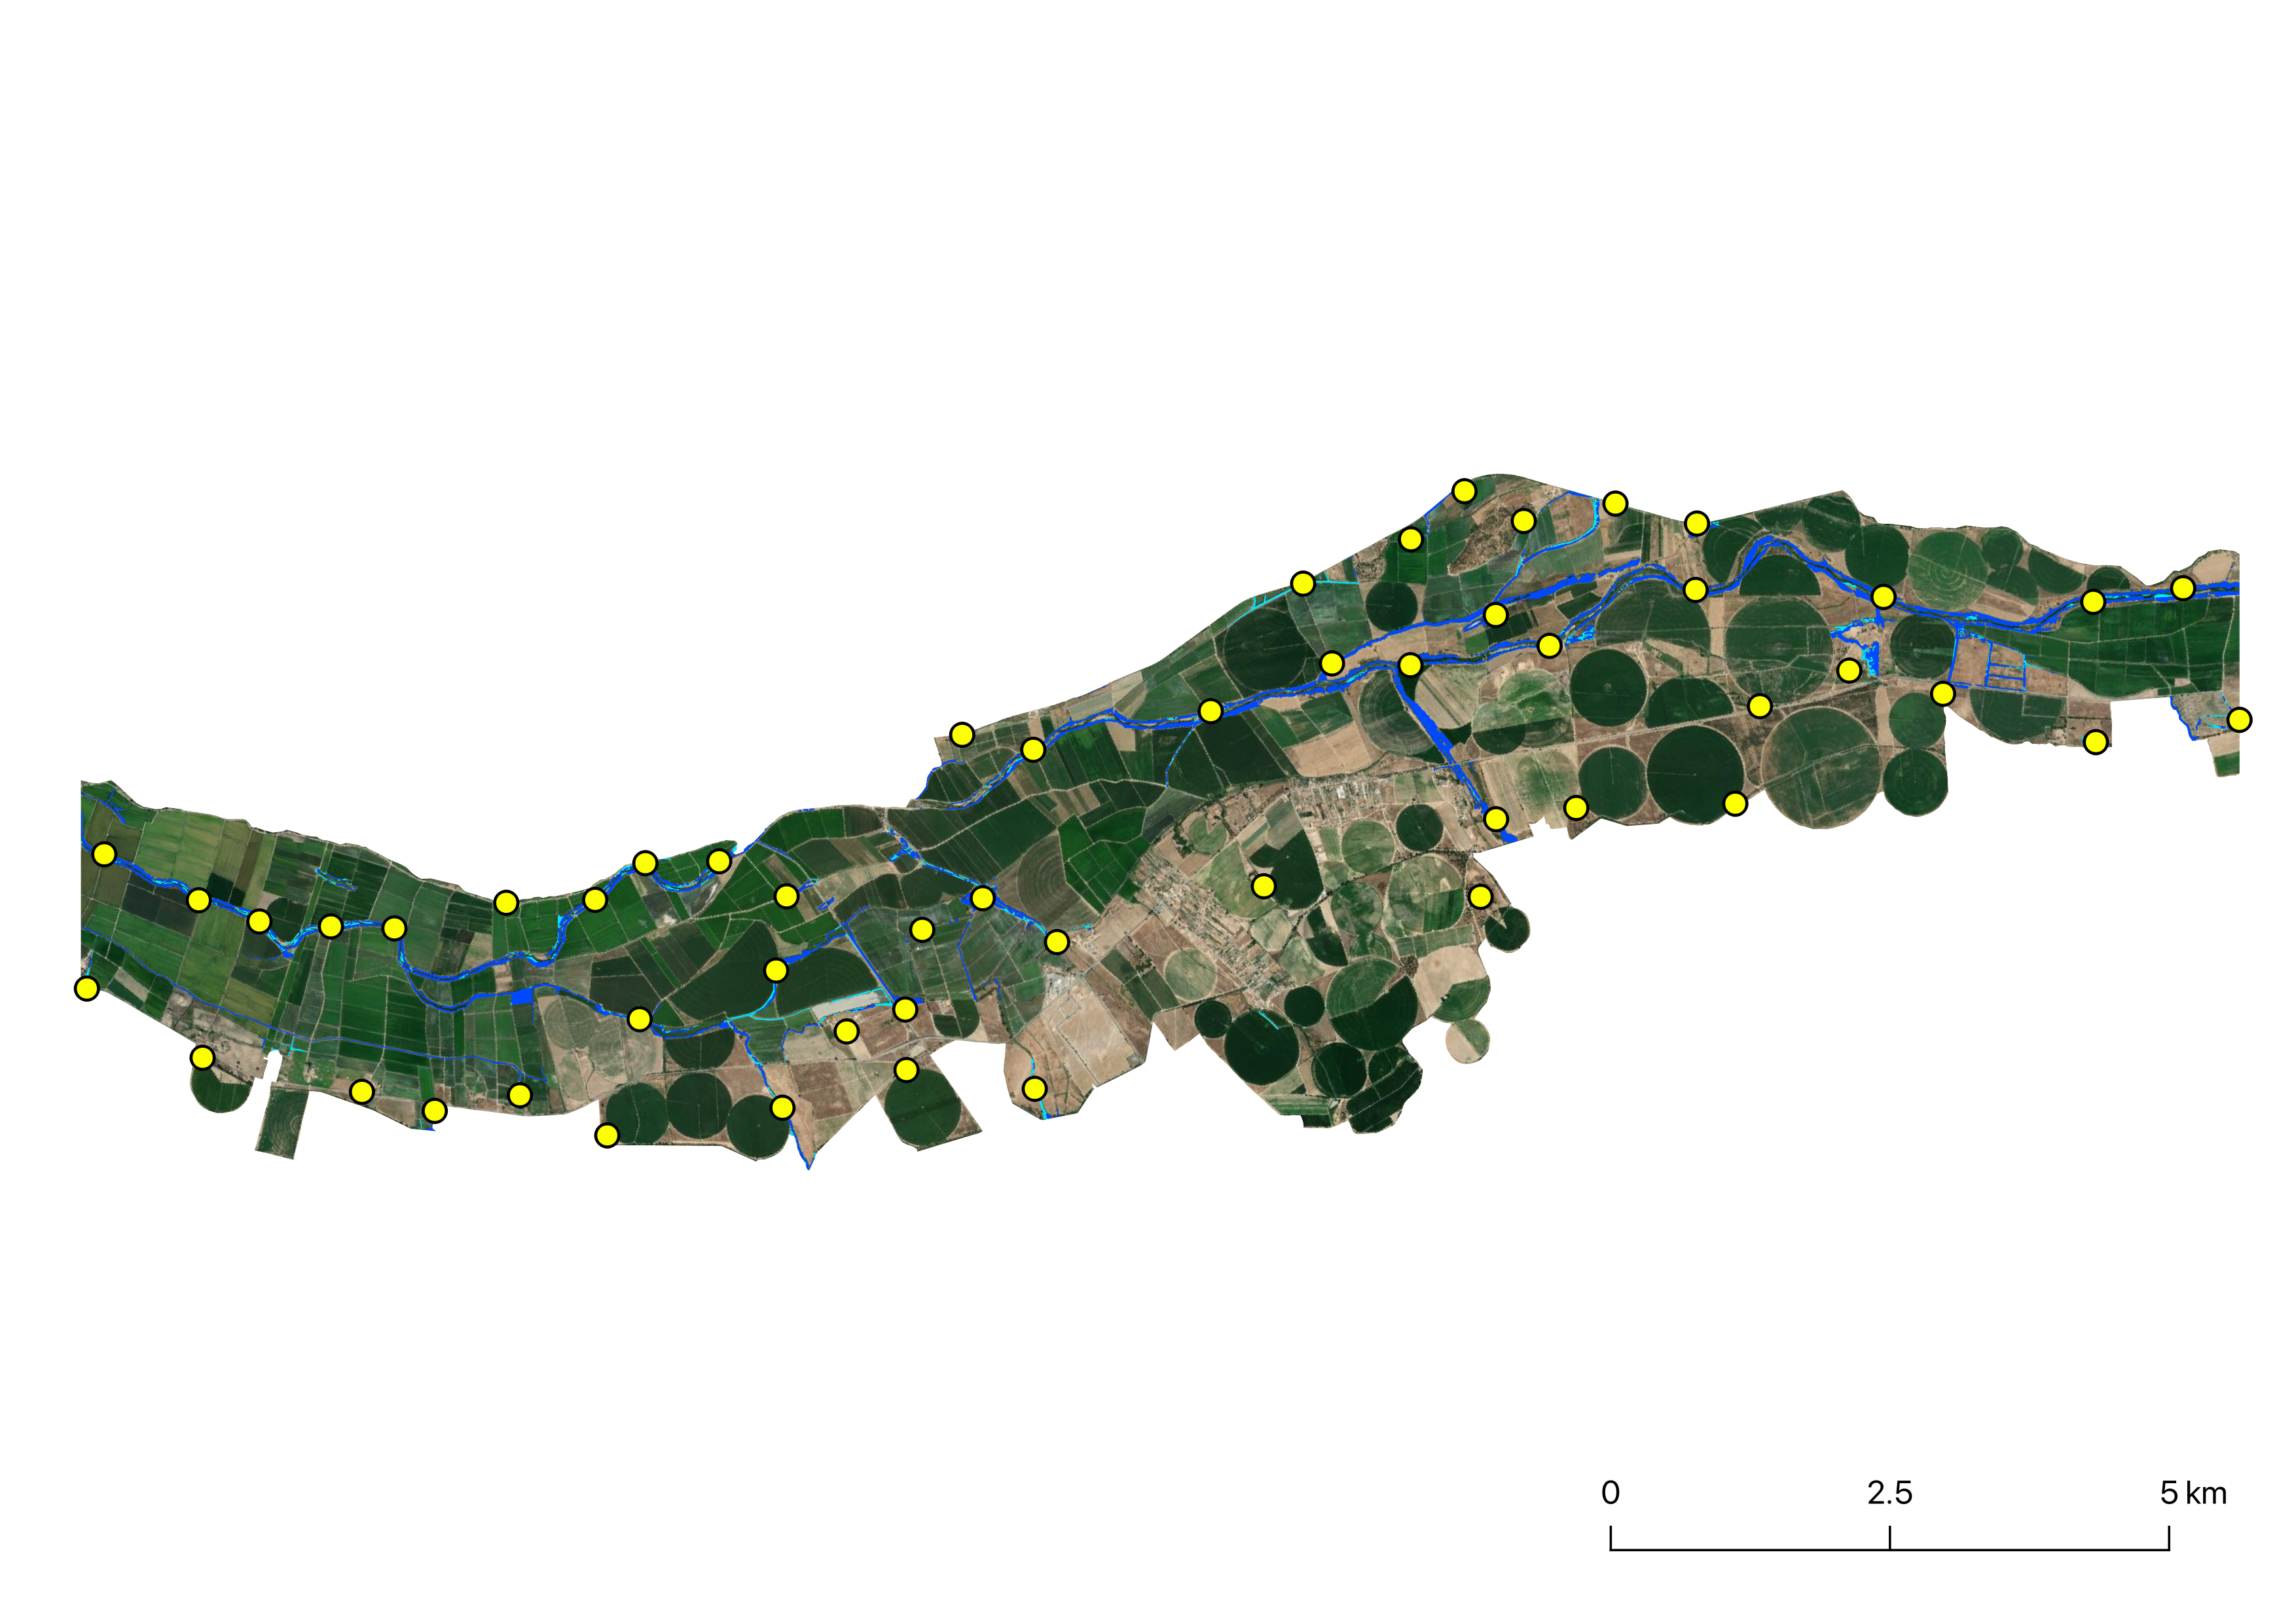

Supplement: s1 [file s1 › Figure S10.tif]

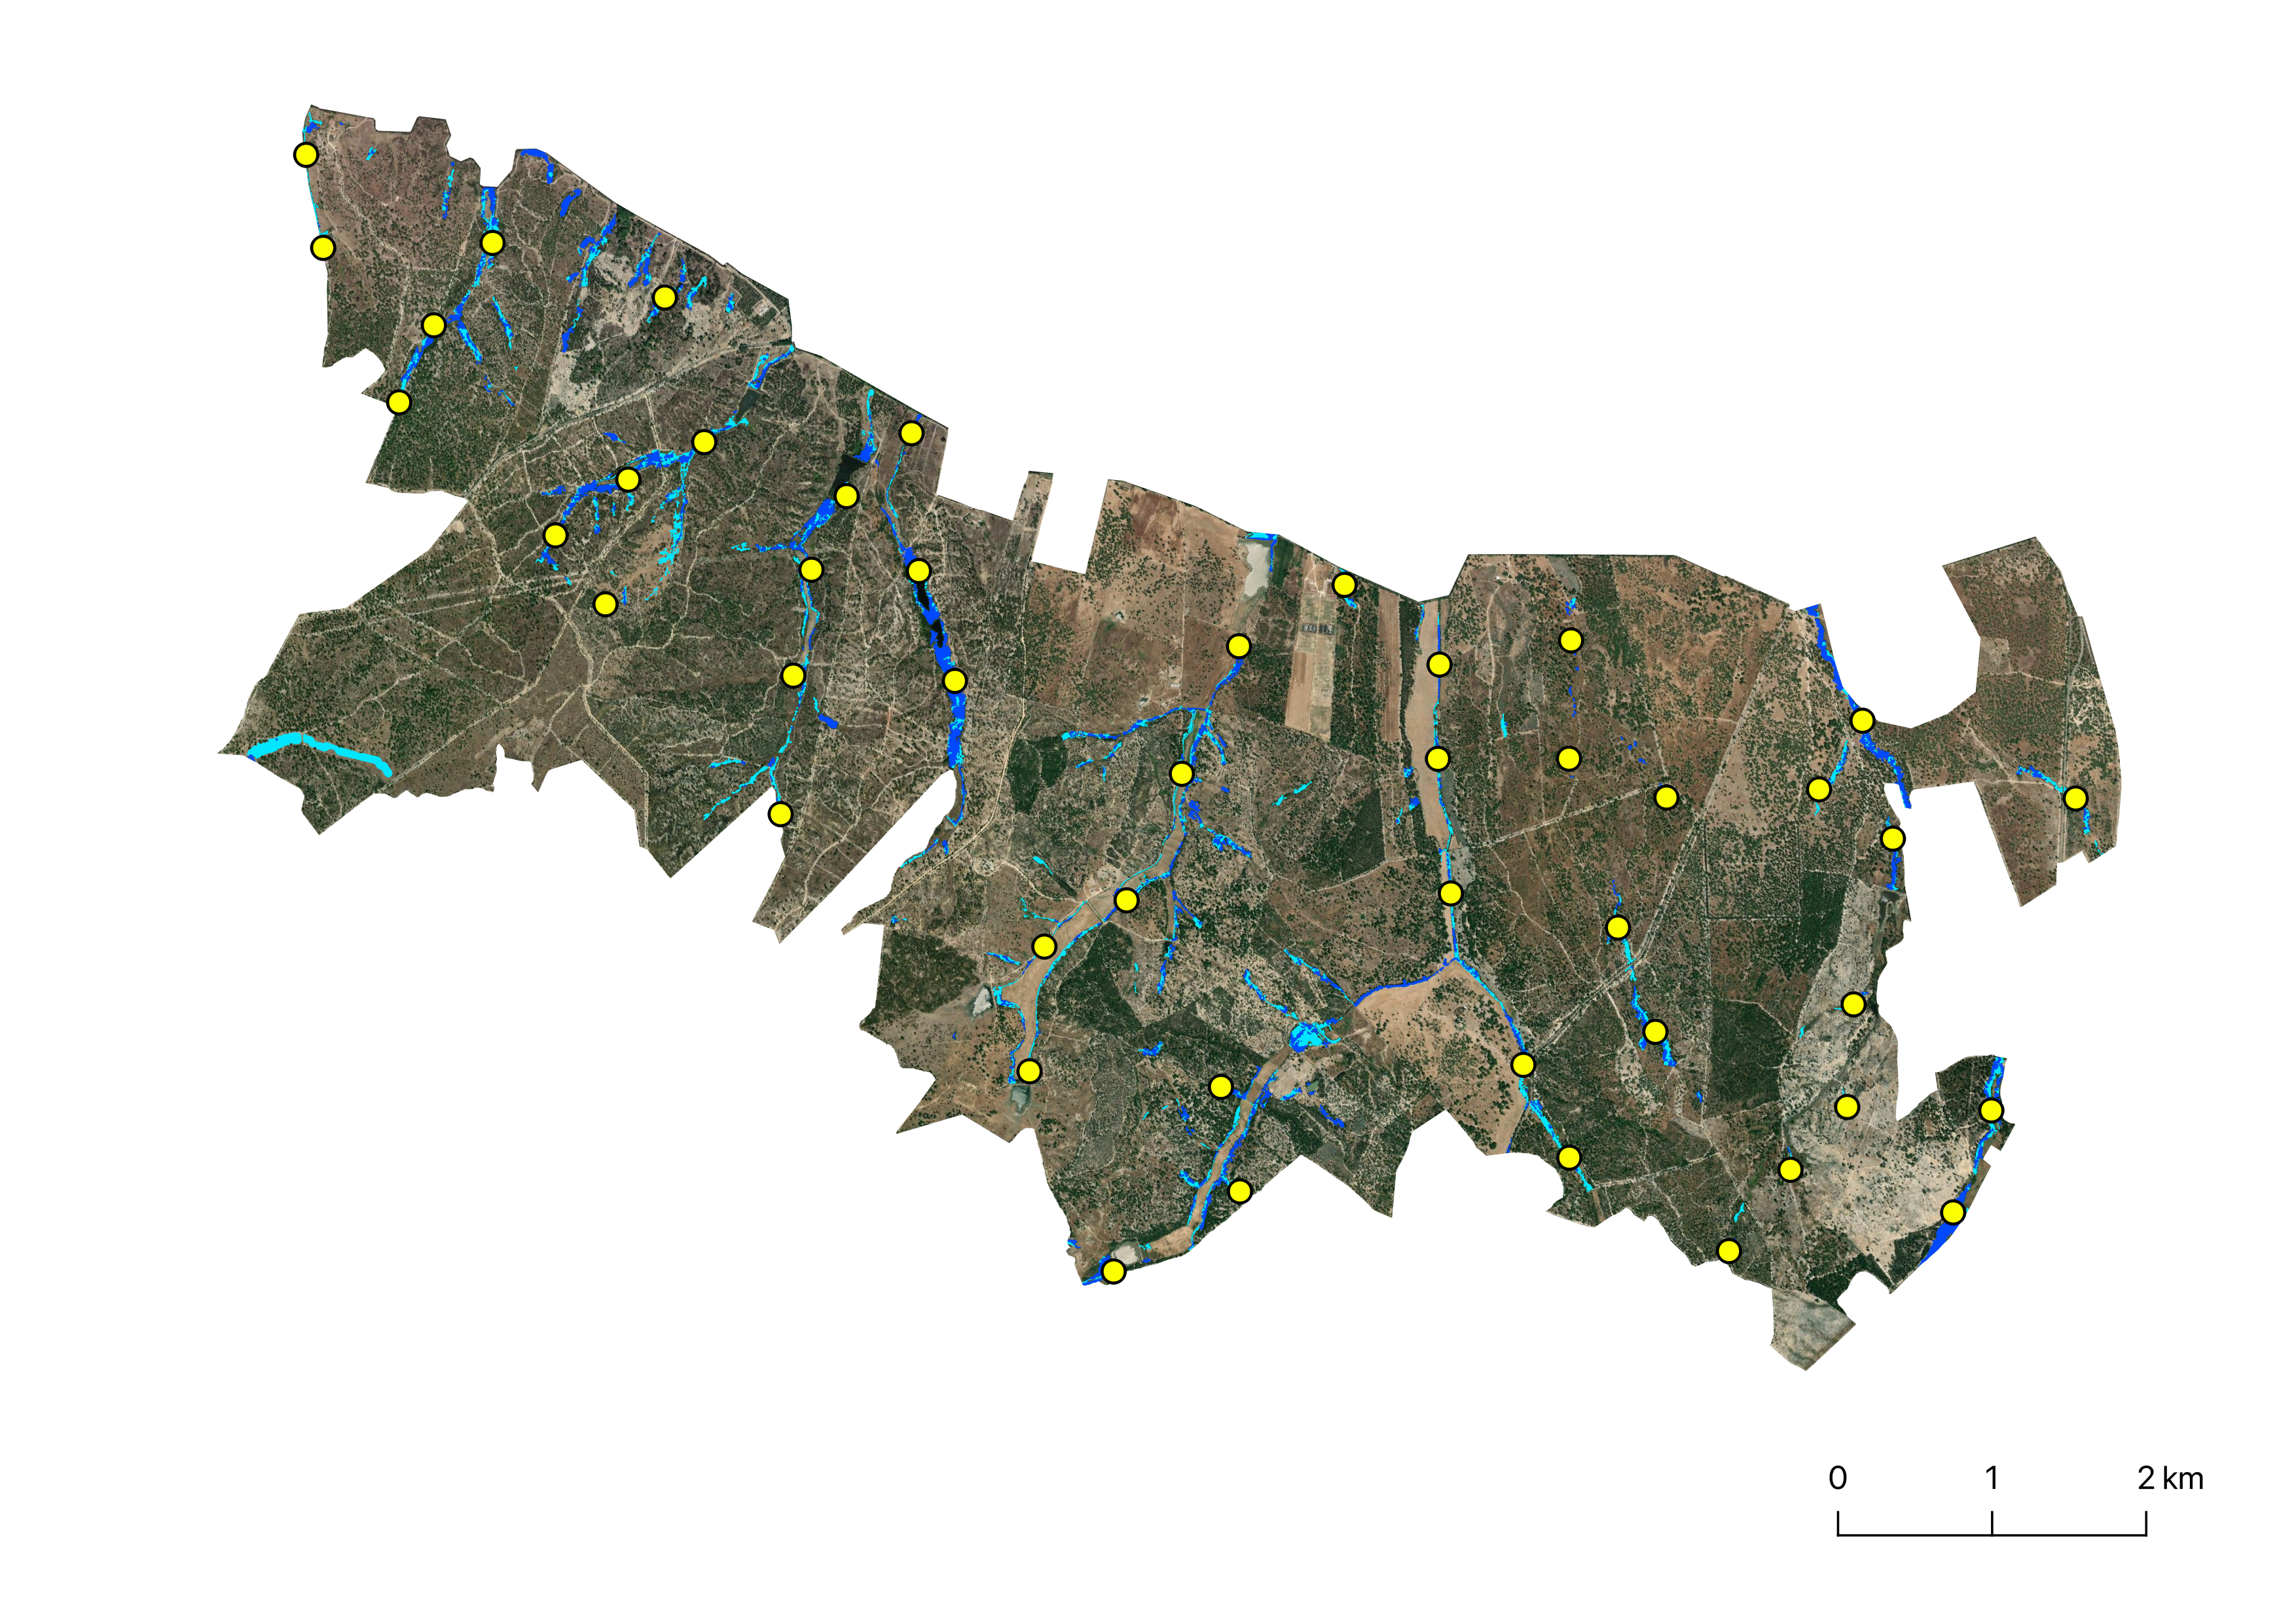

Supplement: s1 [file s1 › Figure S11.tif]

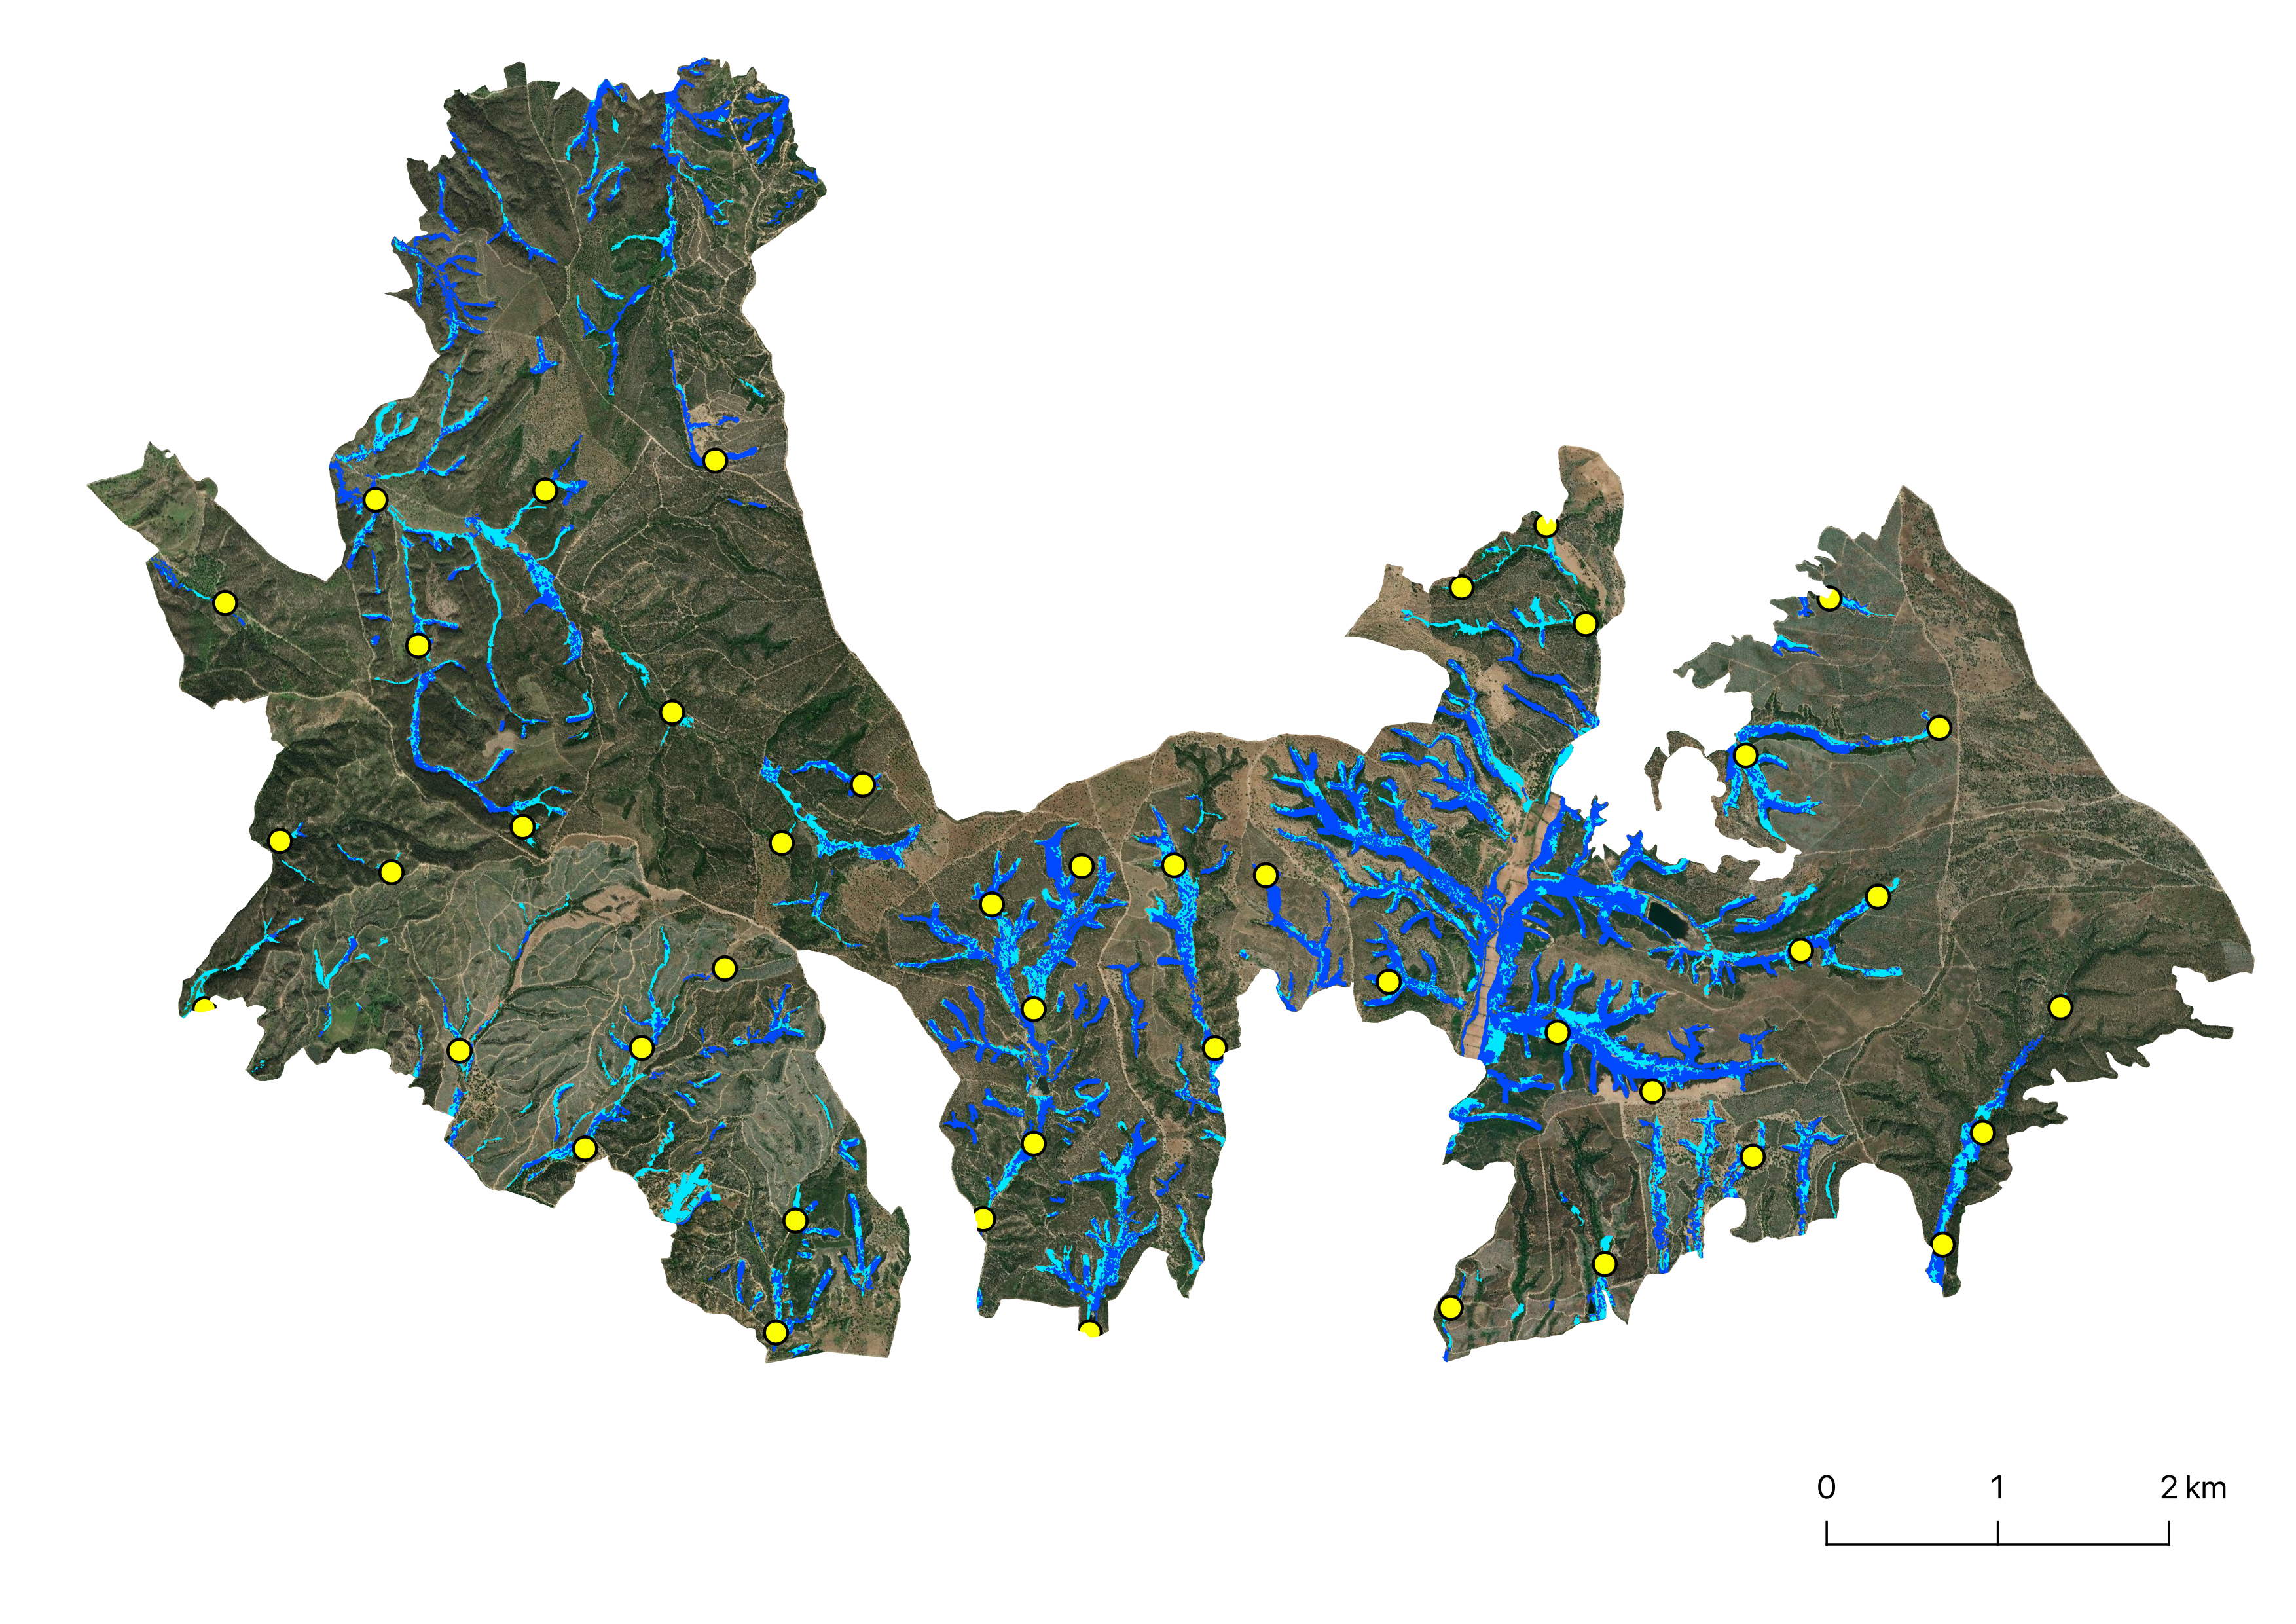

Supplement: s1 [file s1 › Figure S12.tif]

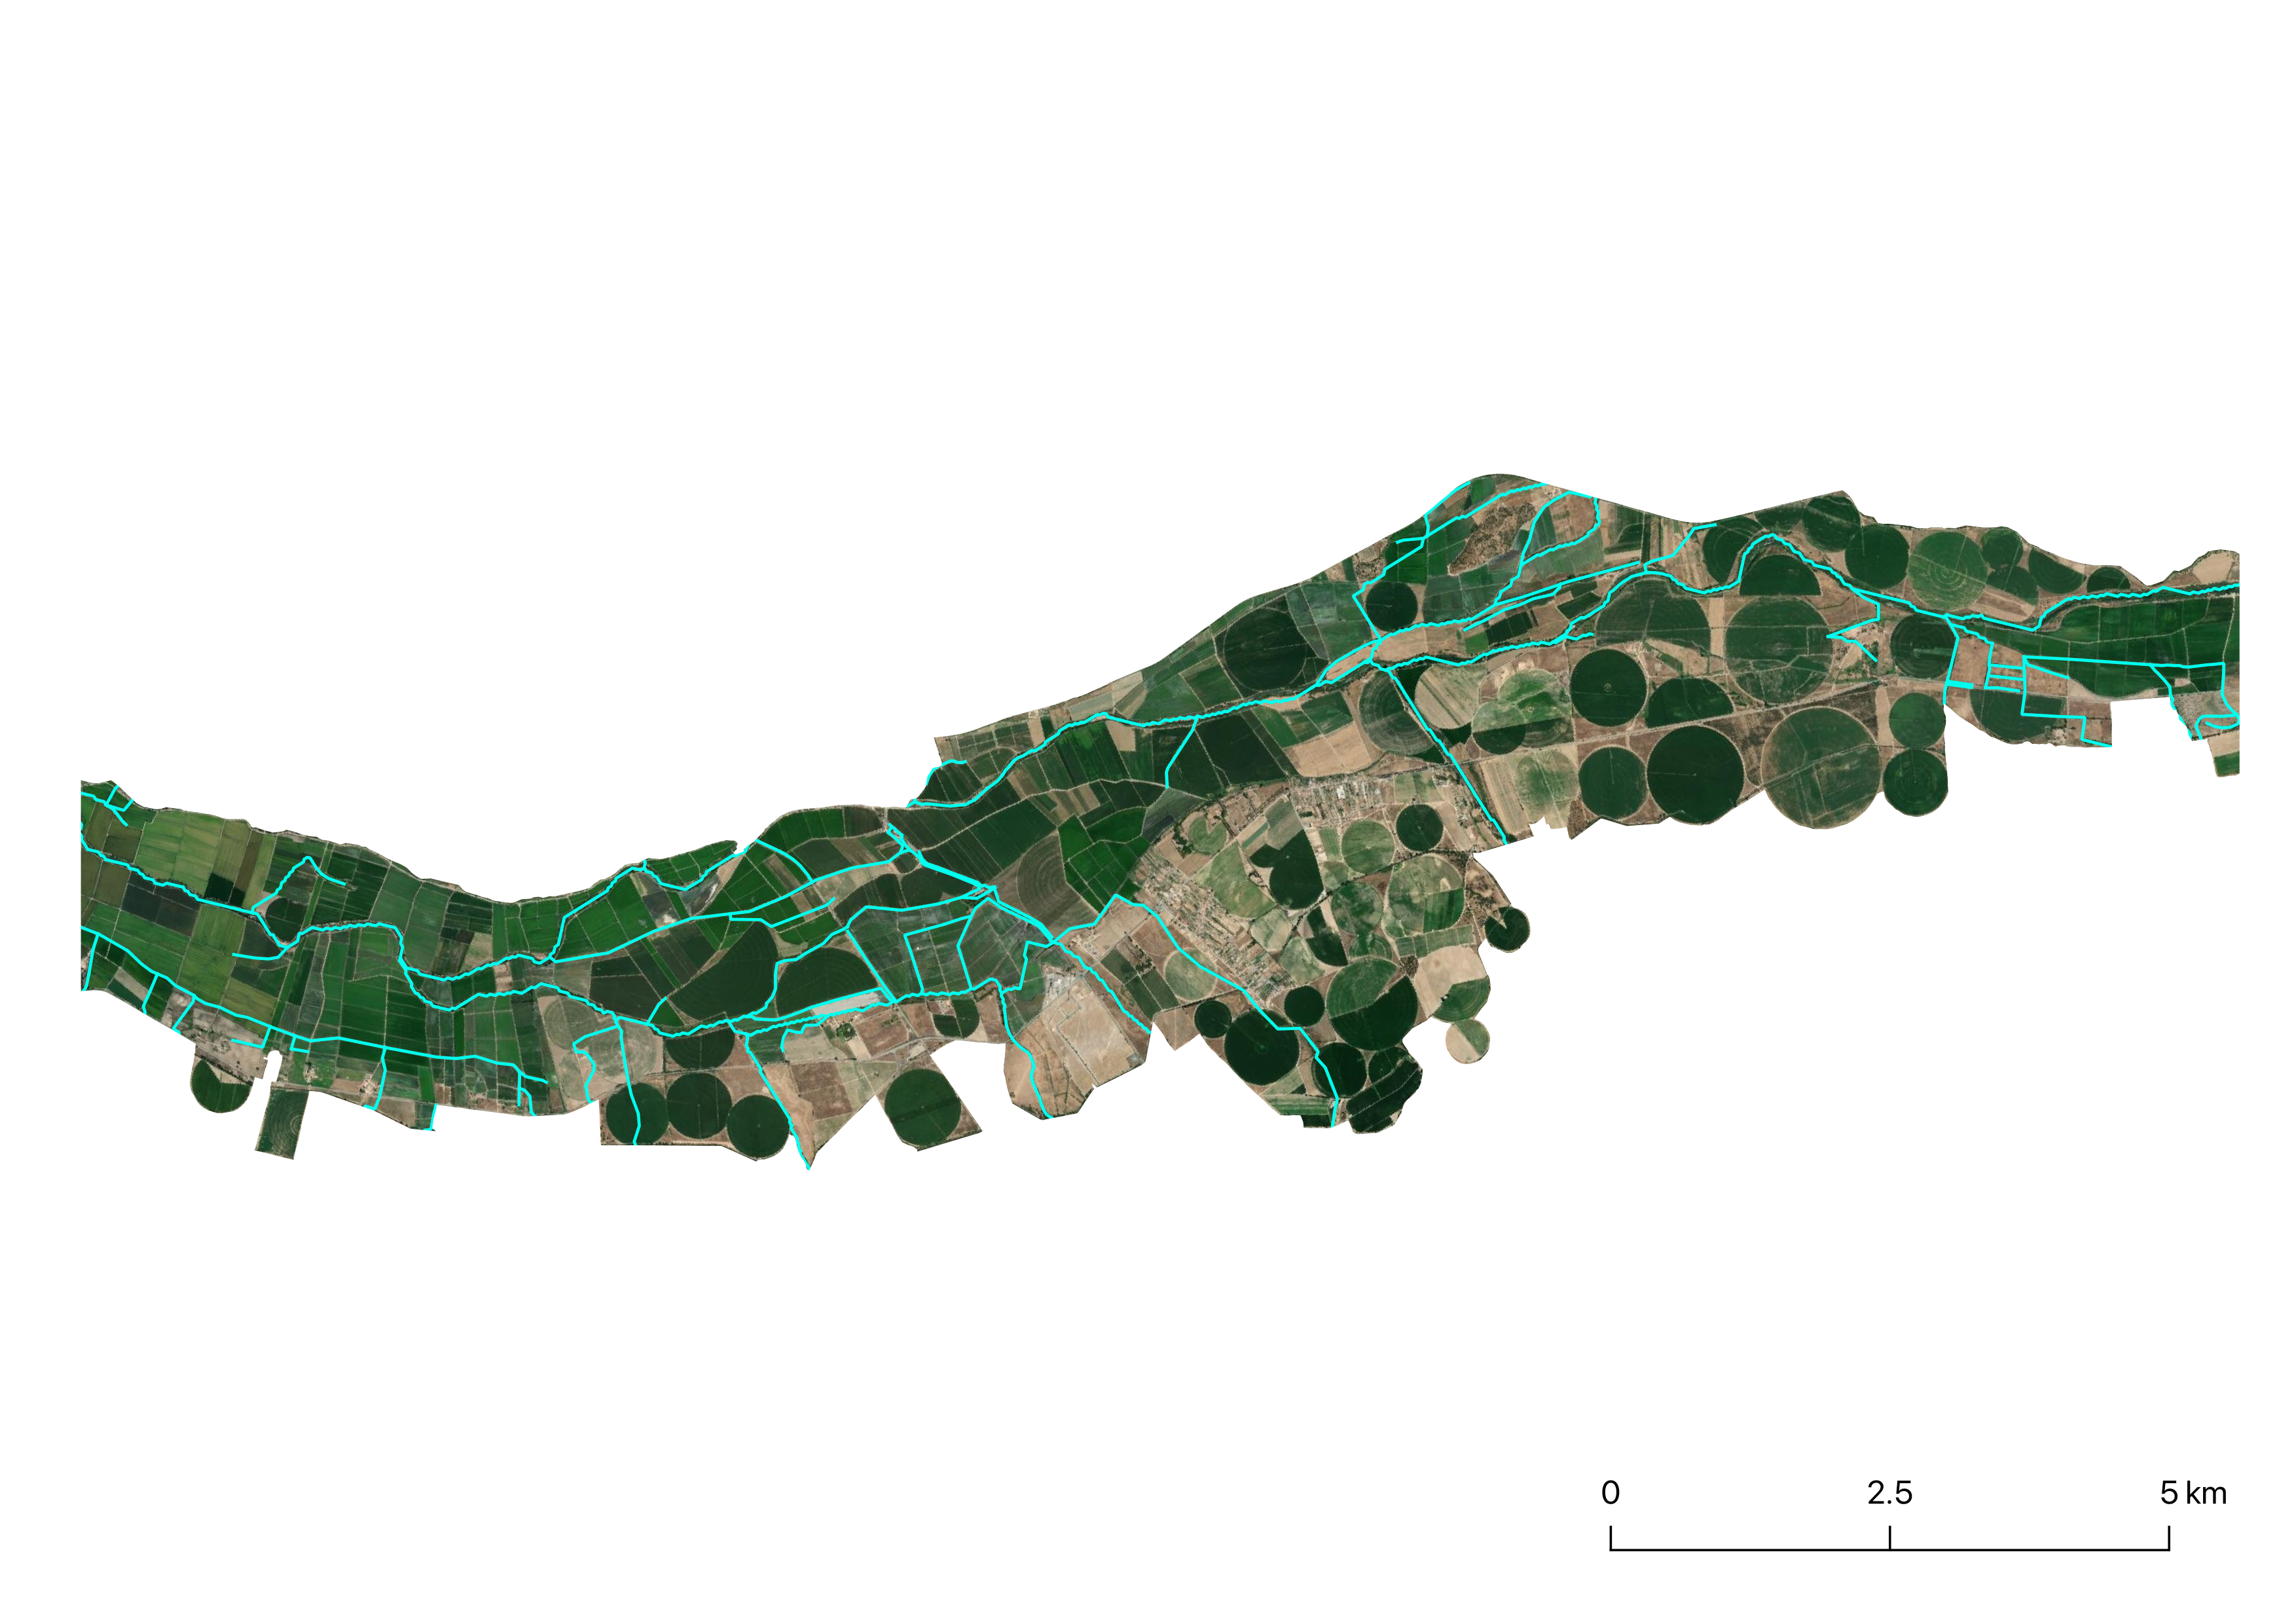

Supplement: s1 [file s1 › Figure S2.tif]

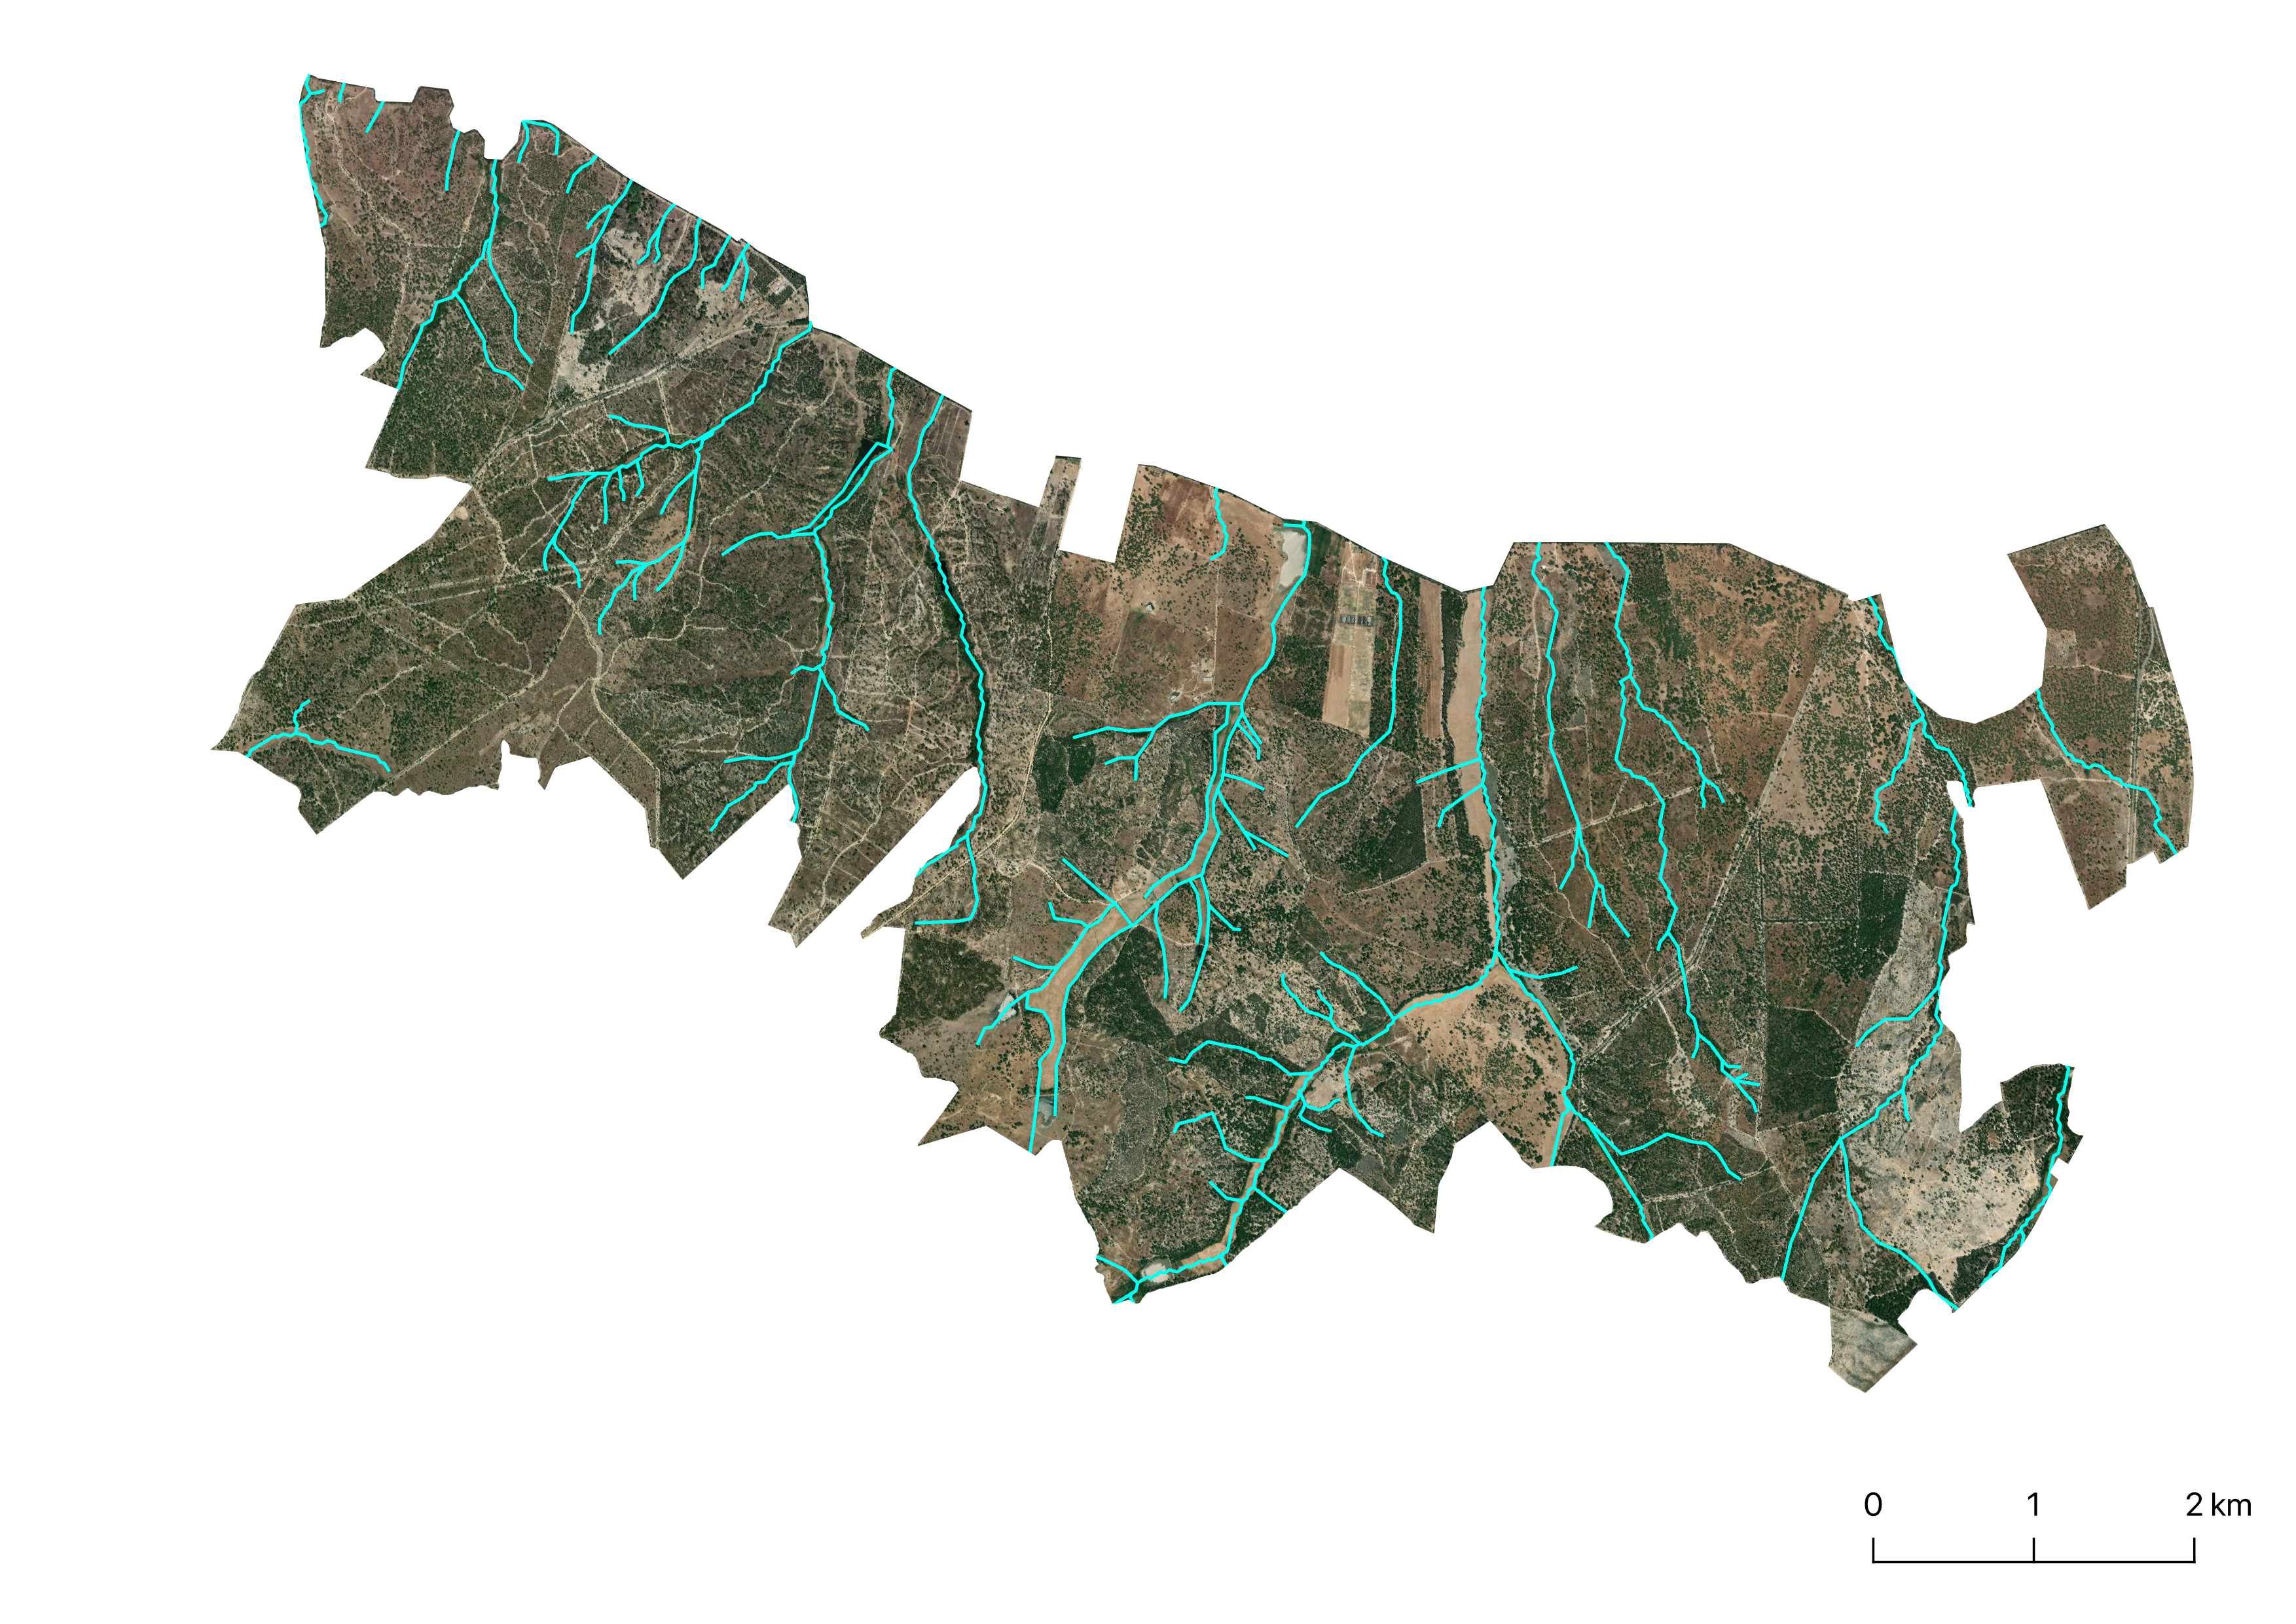

Supplement: s1 [file s1 › Figure S3.tif]

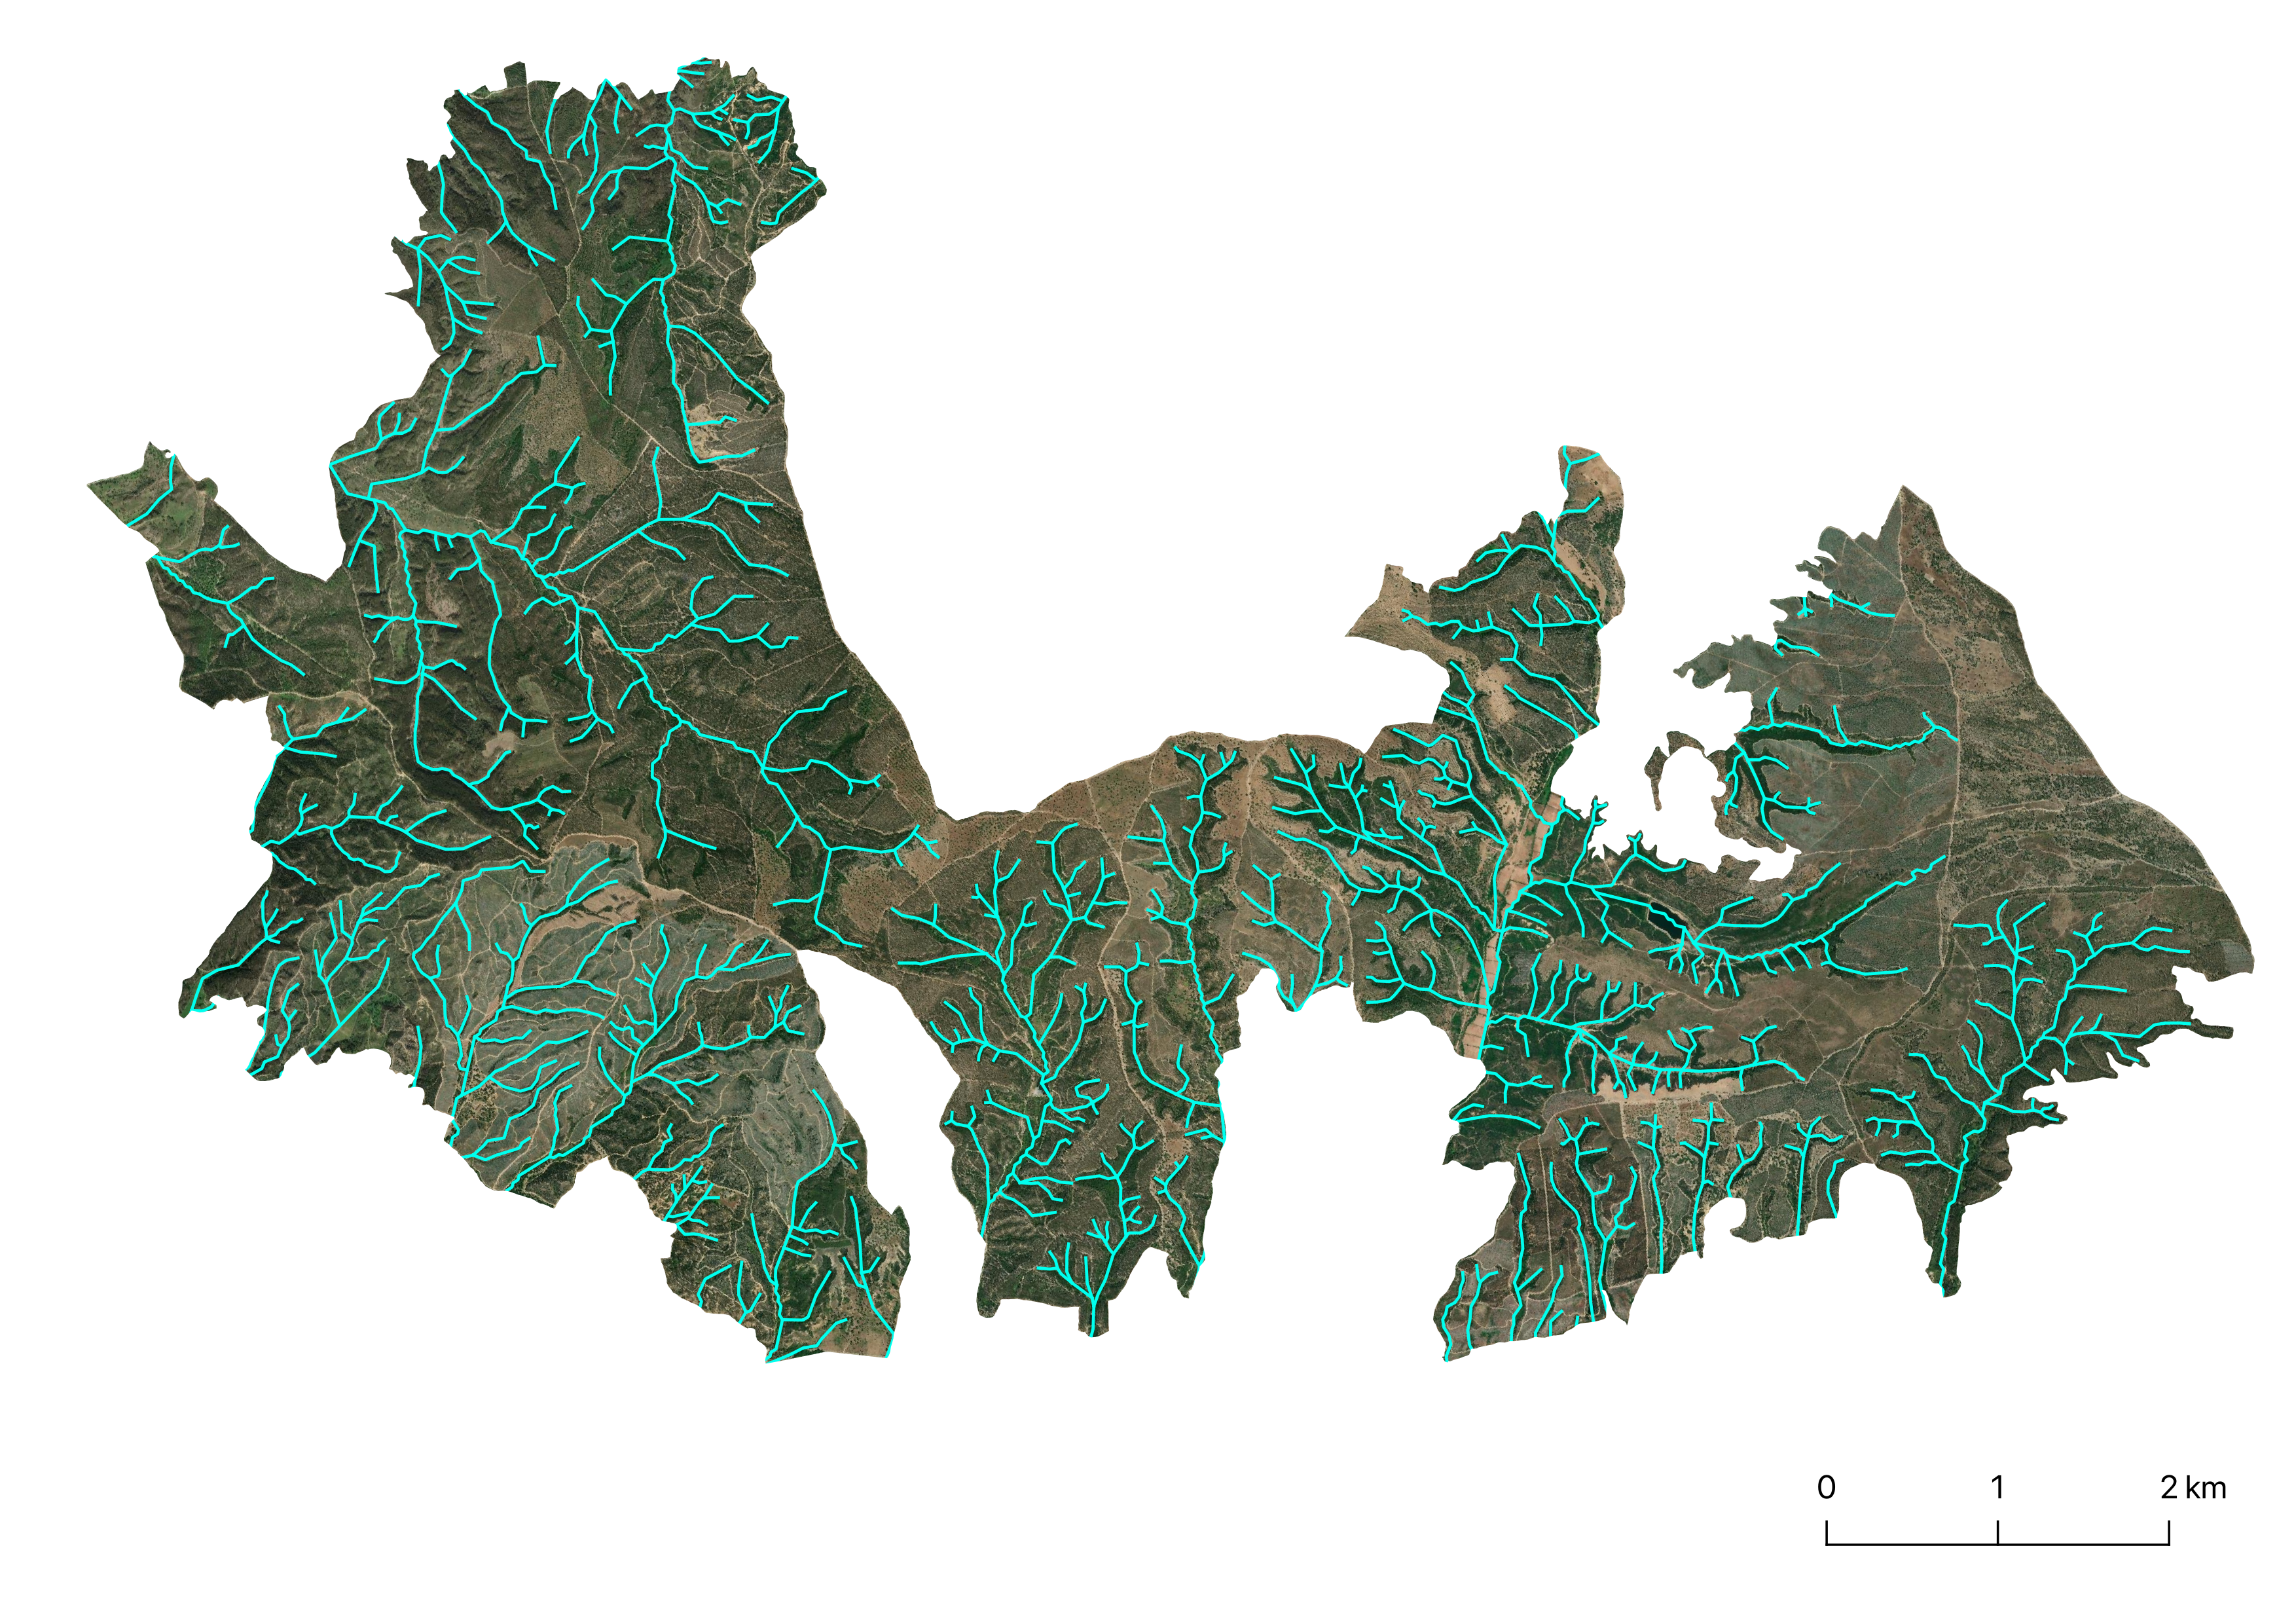

Supplement: s1 [file s1 › Figure S4.tif]

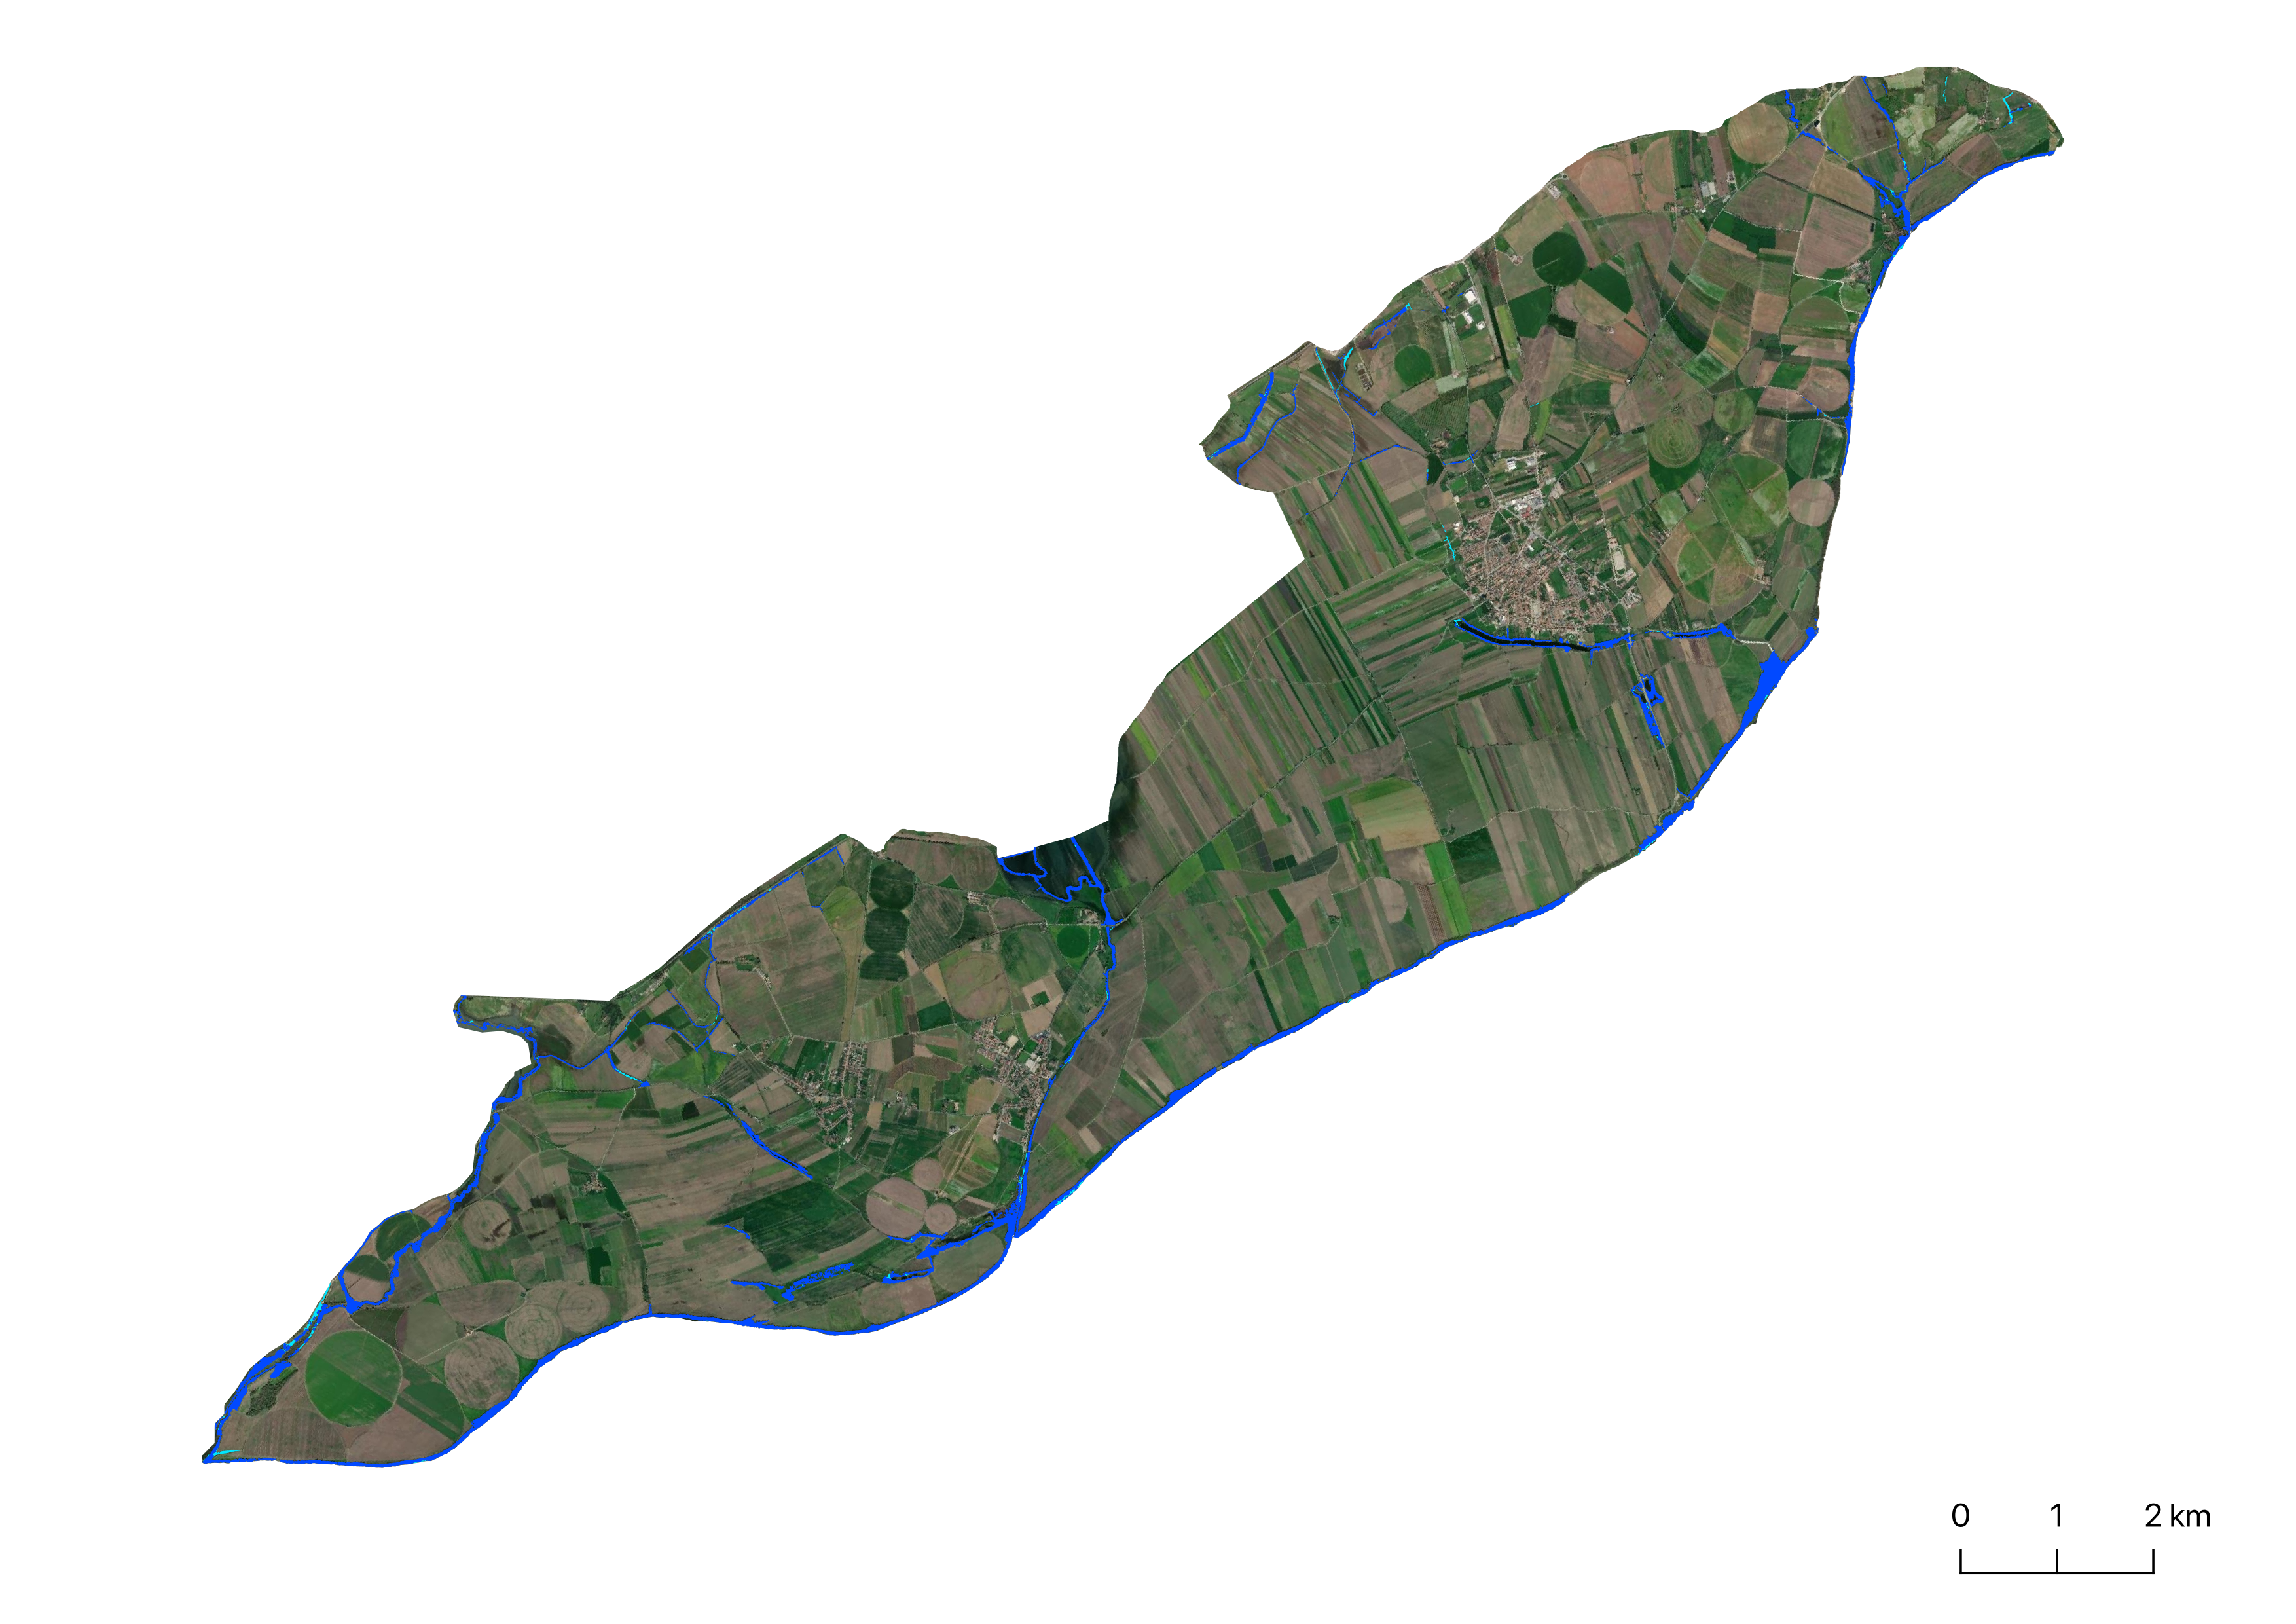

Supplement: s1 [file s1 › Figure S5.tif]

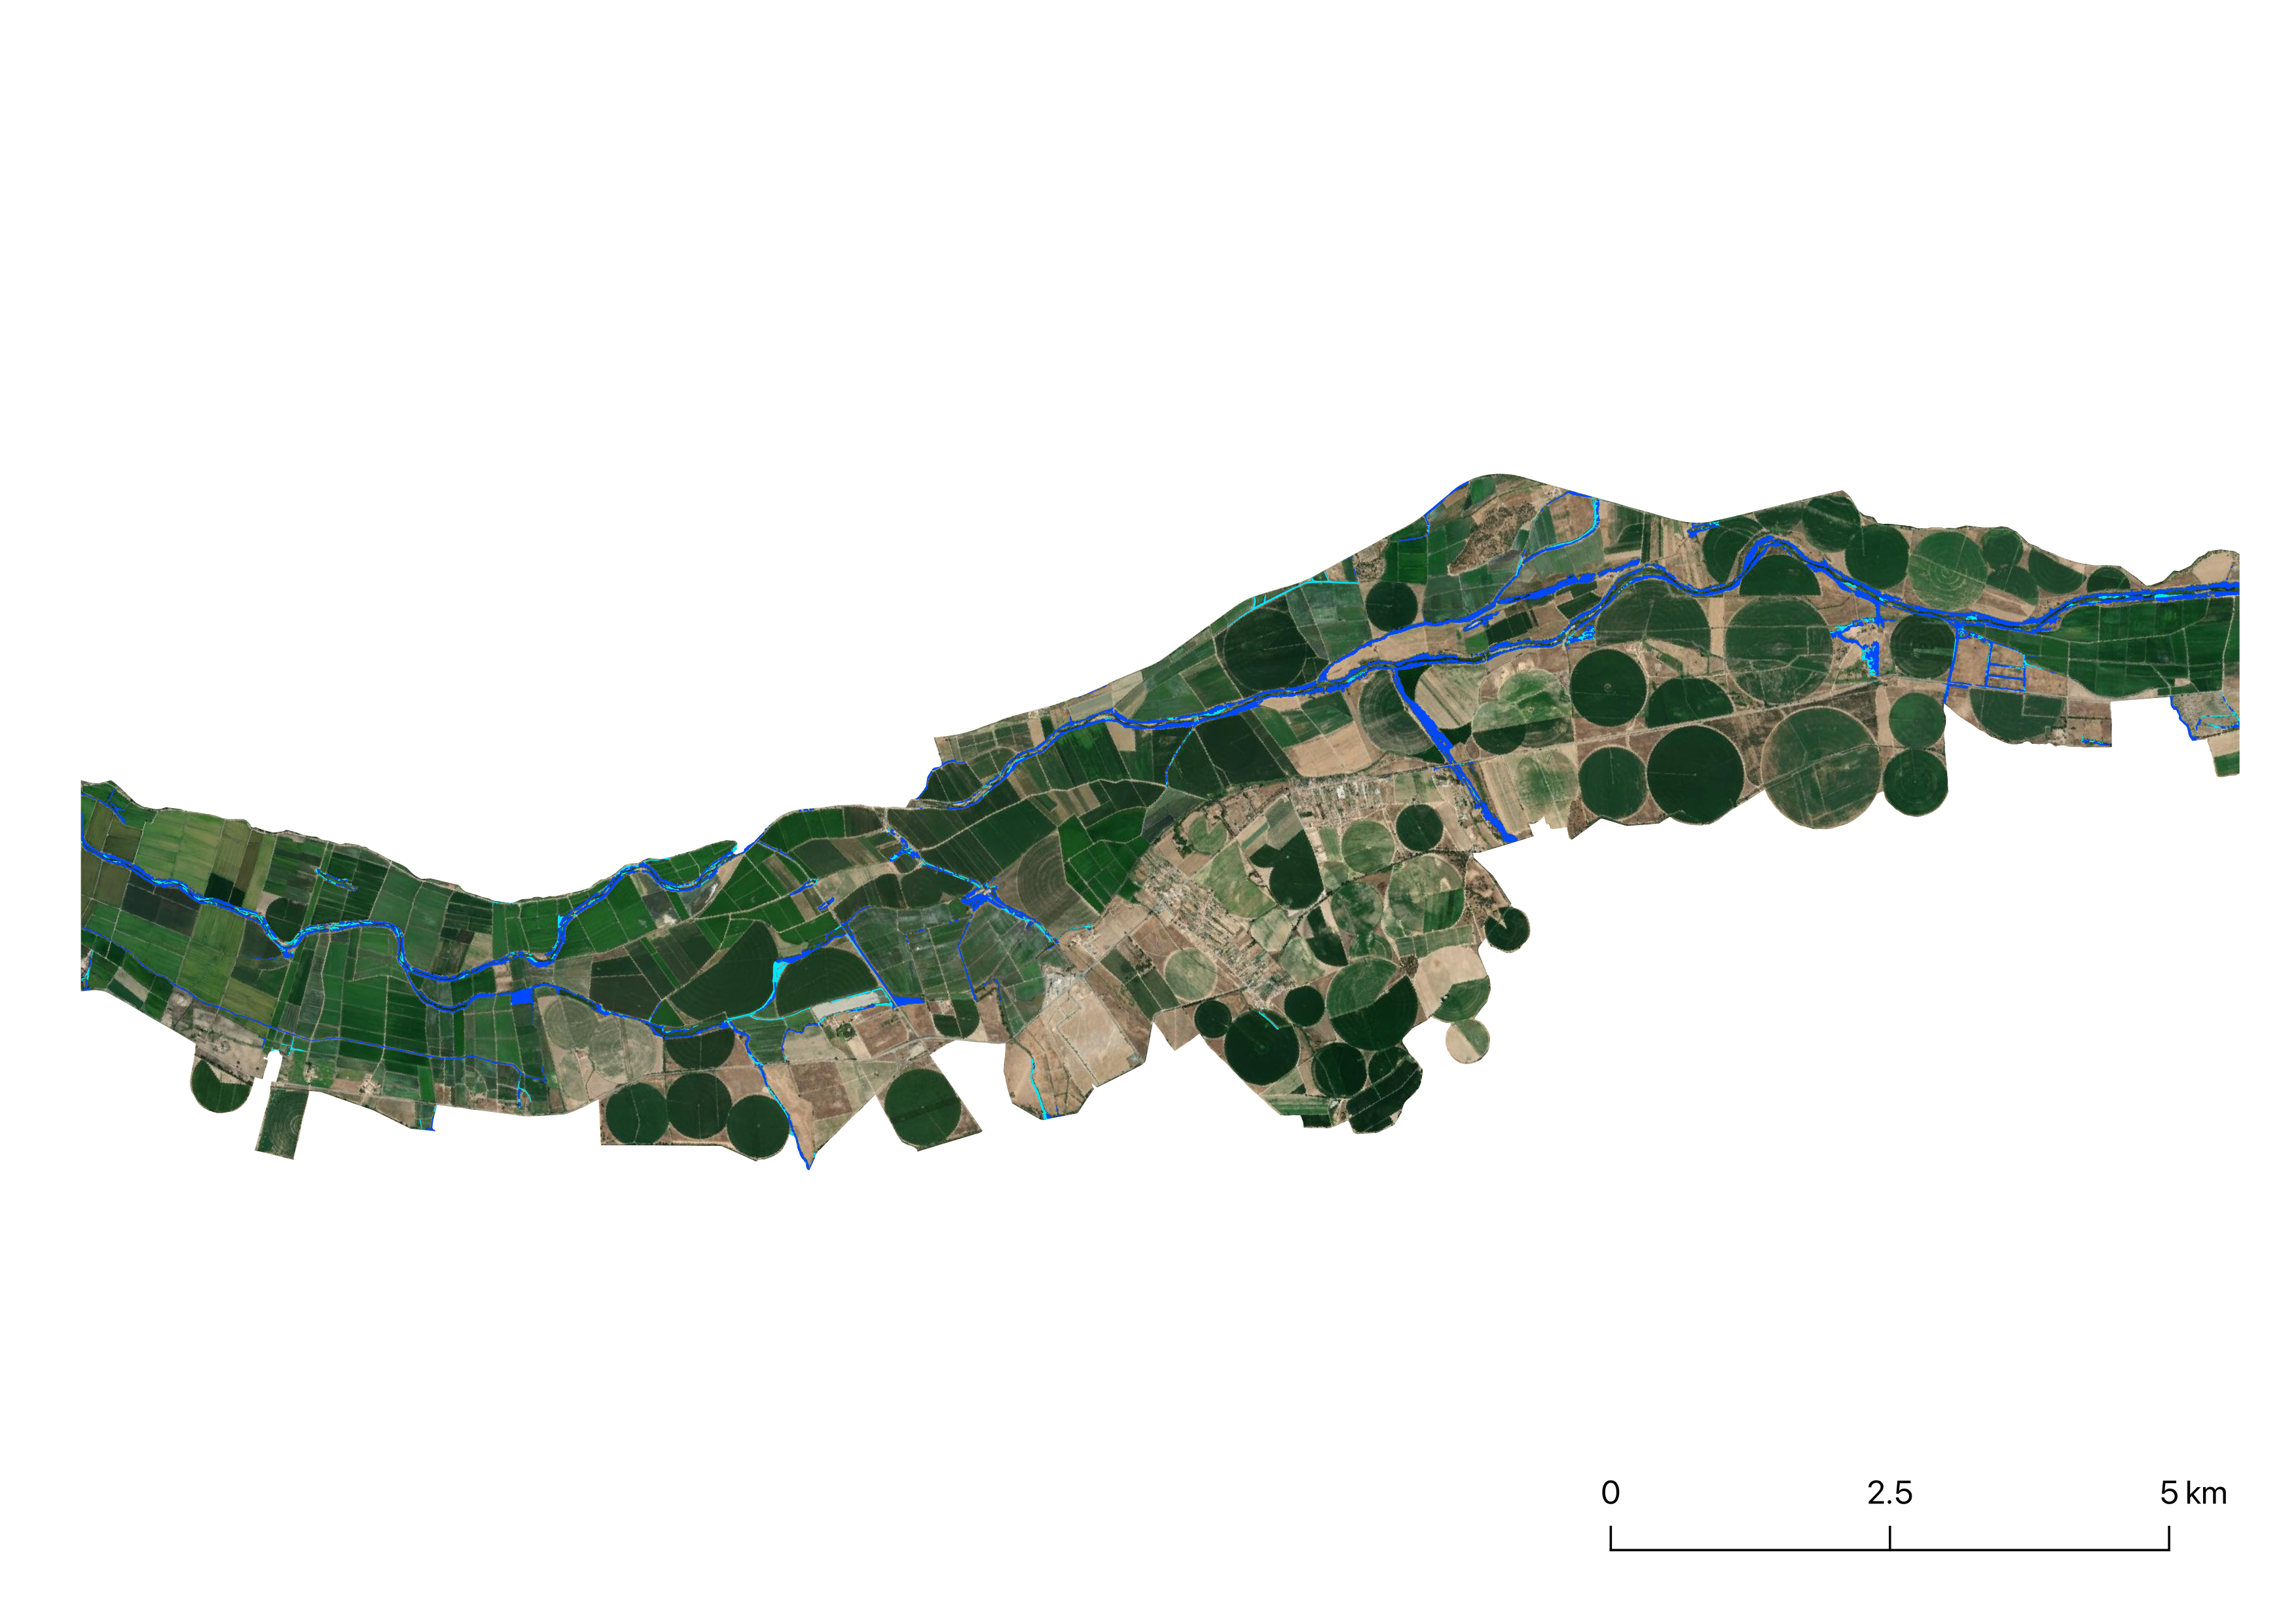

Supplement: s1 [file s1 › Figure S6.tif]

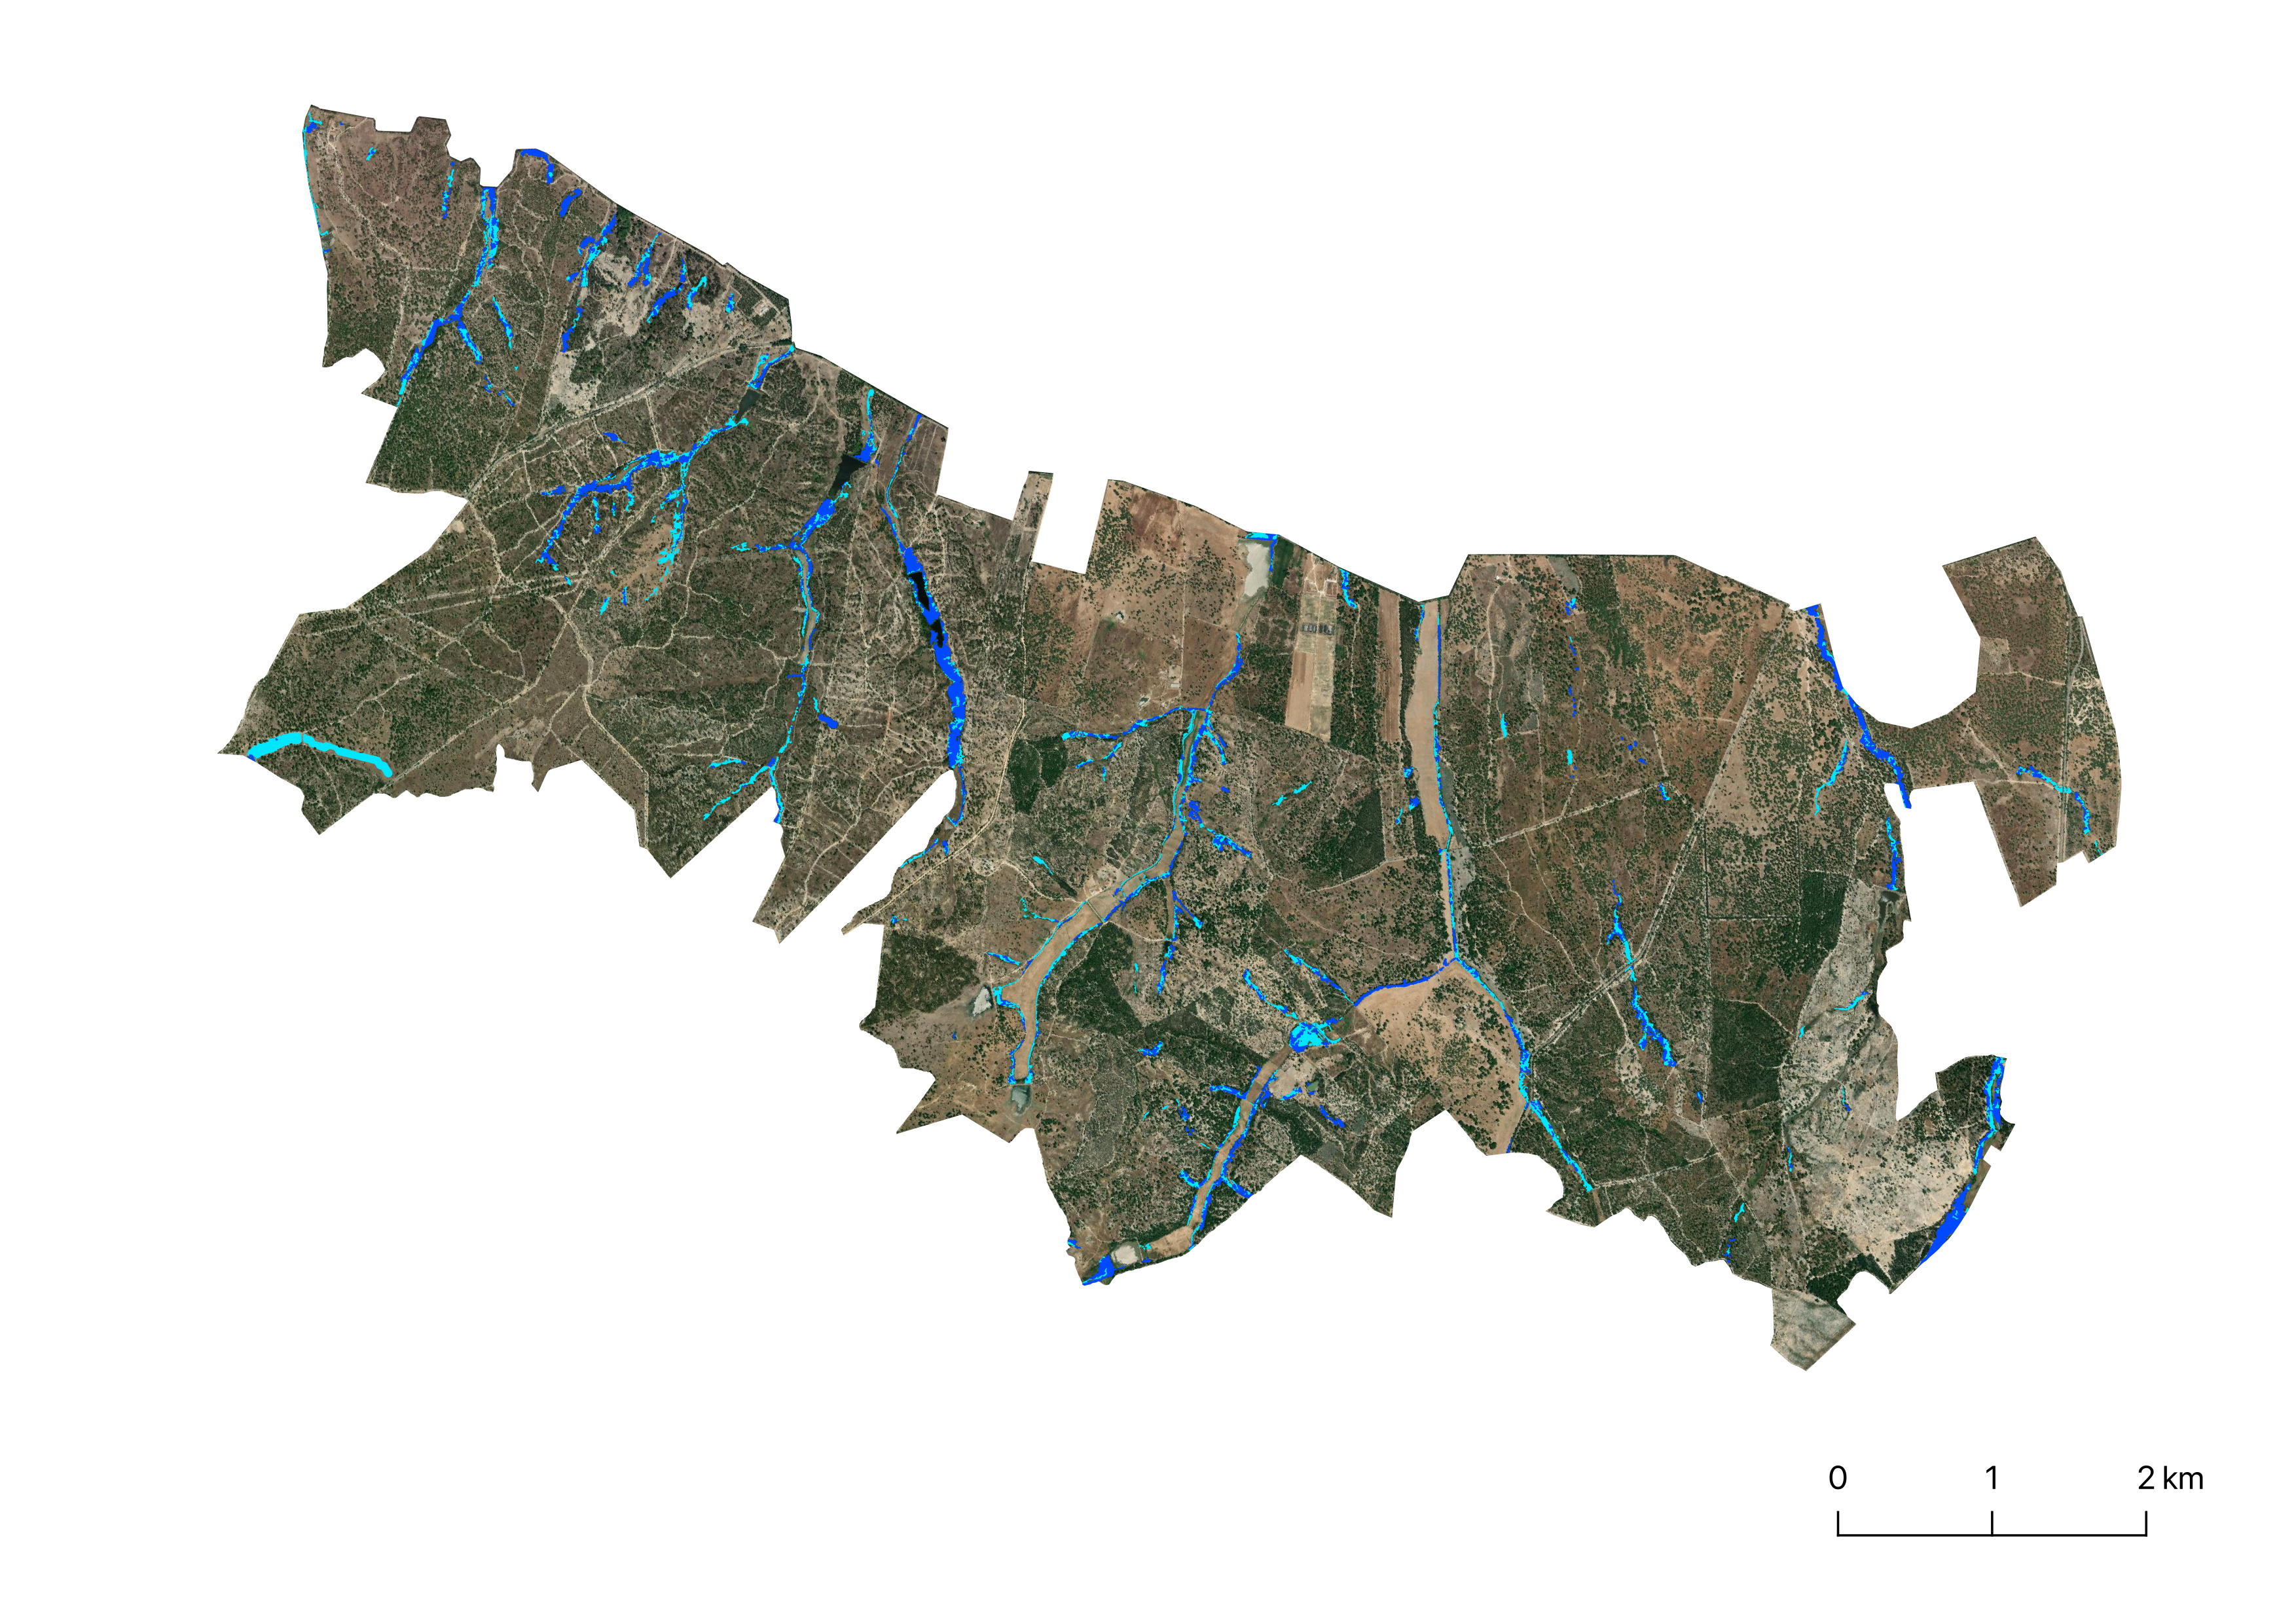

Supplement: s1 [file s1 › Figure S7.tif]

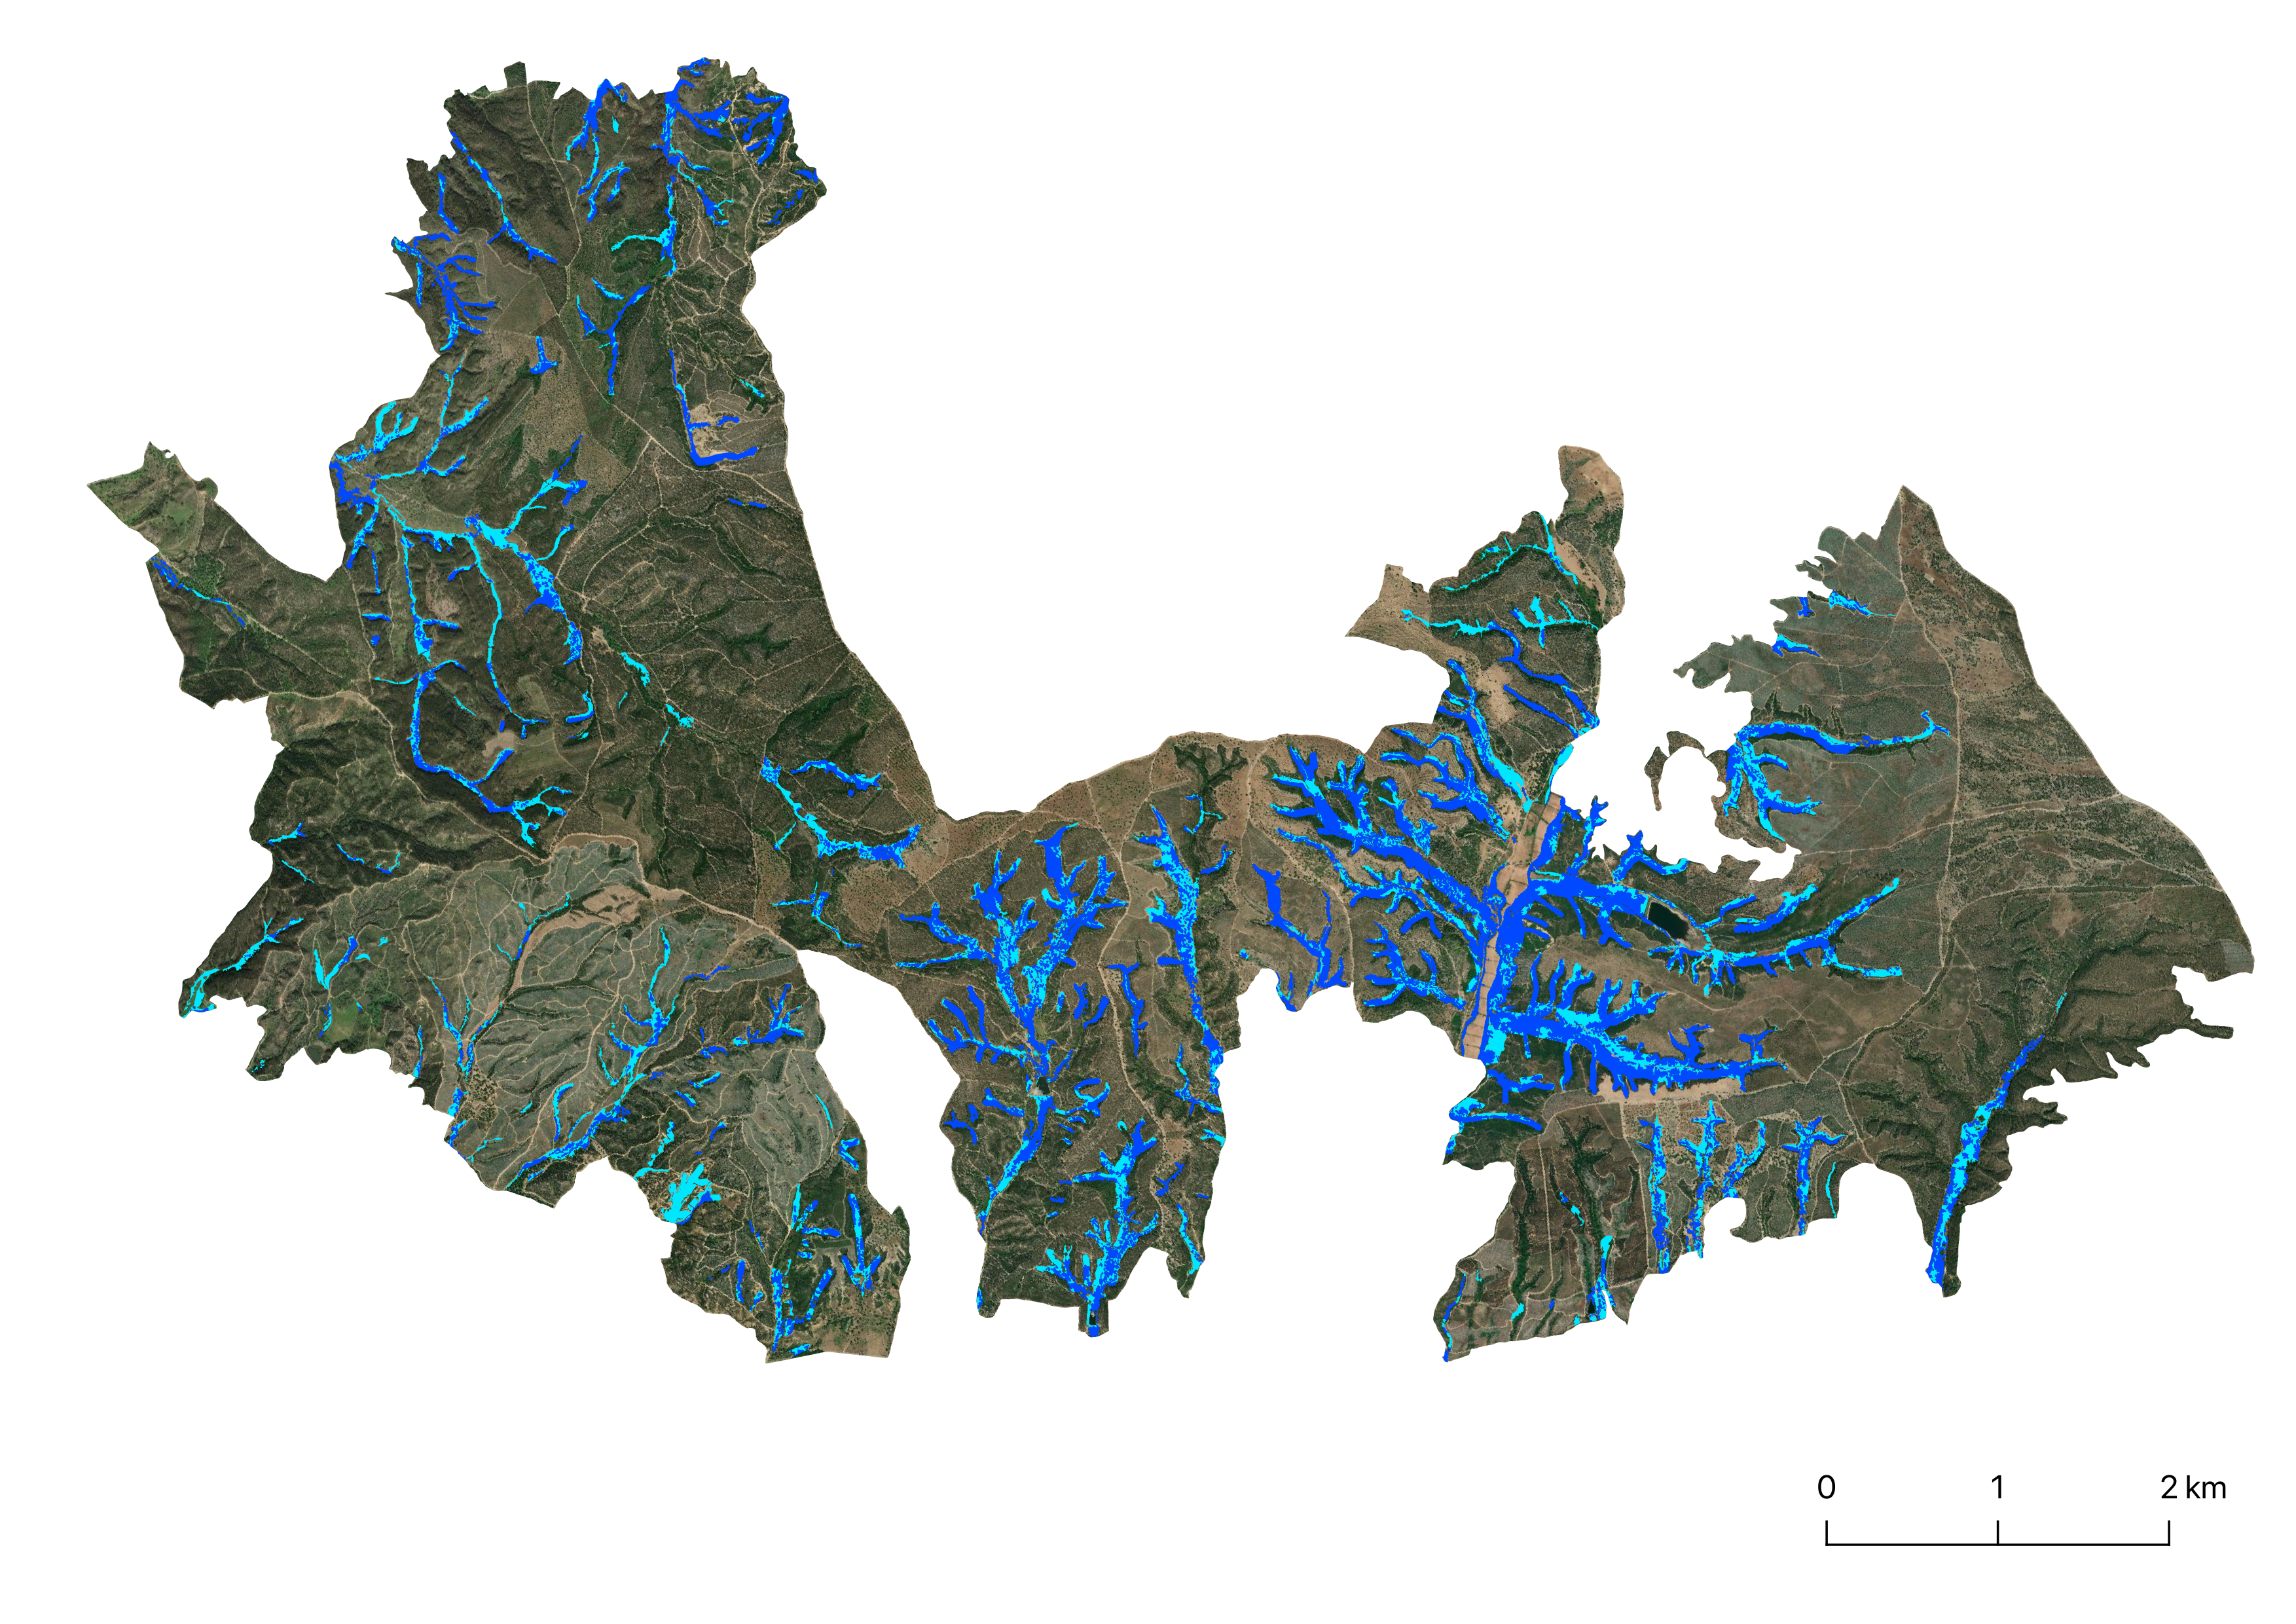

Supplement: s1 [file s1 › Figure S8.tif]

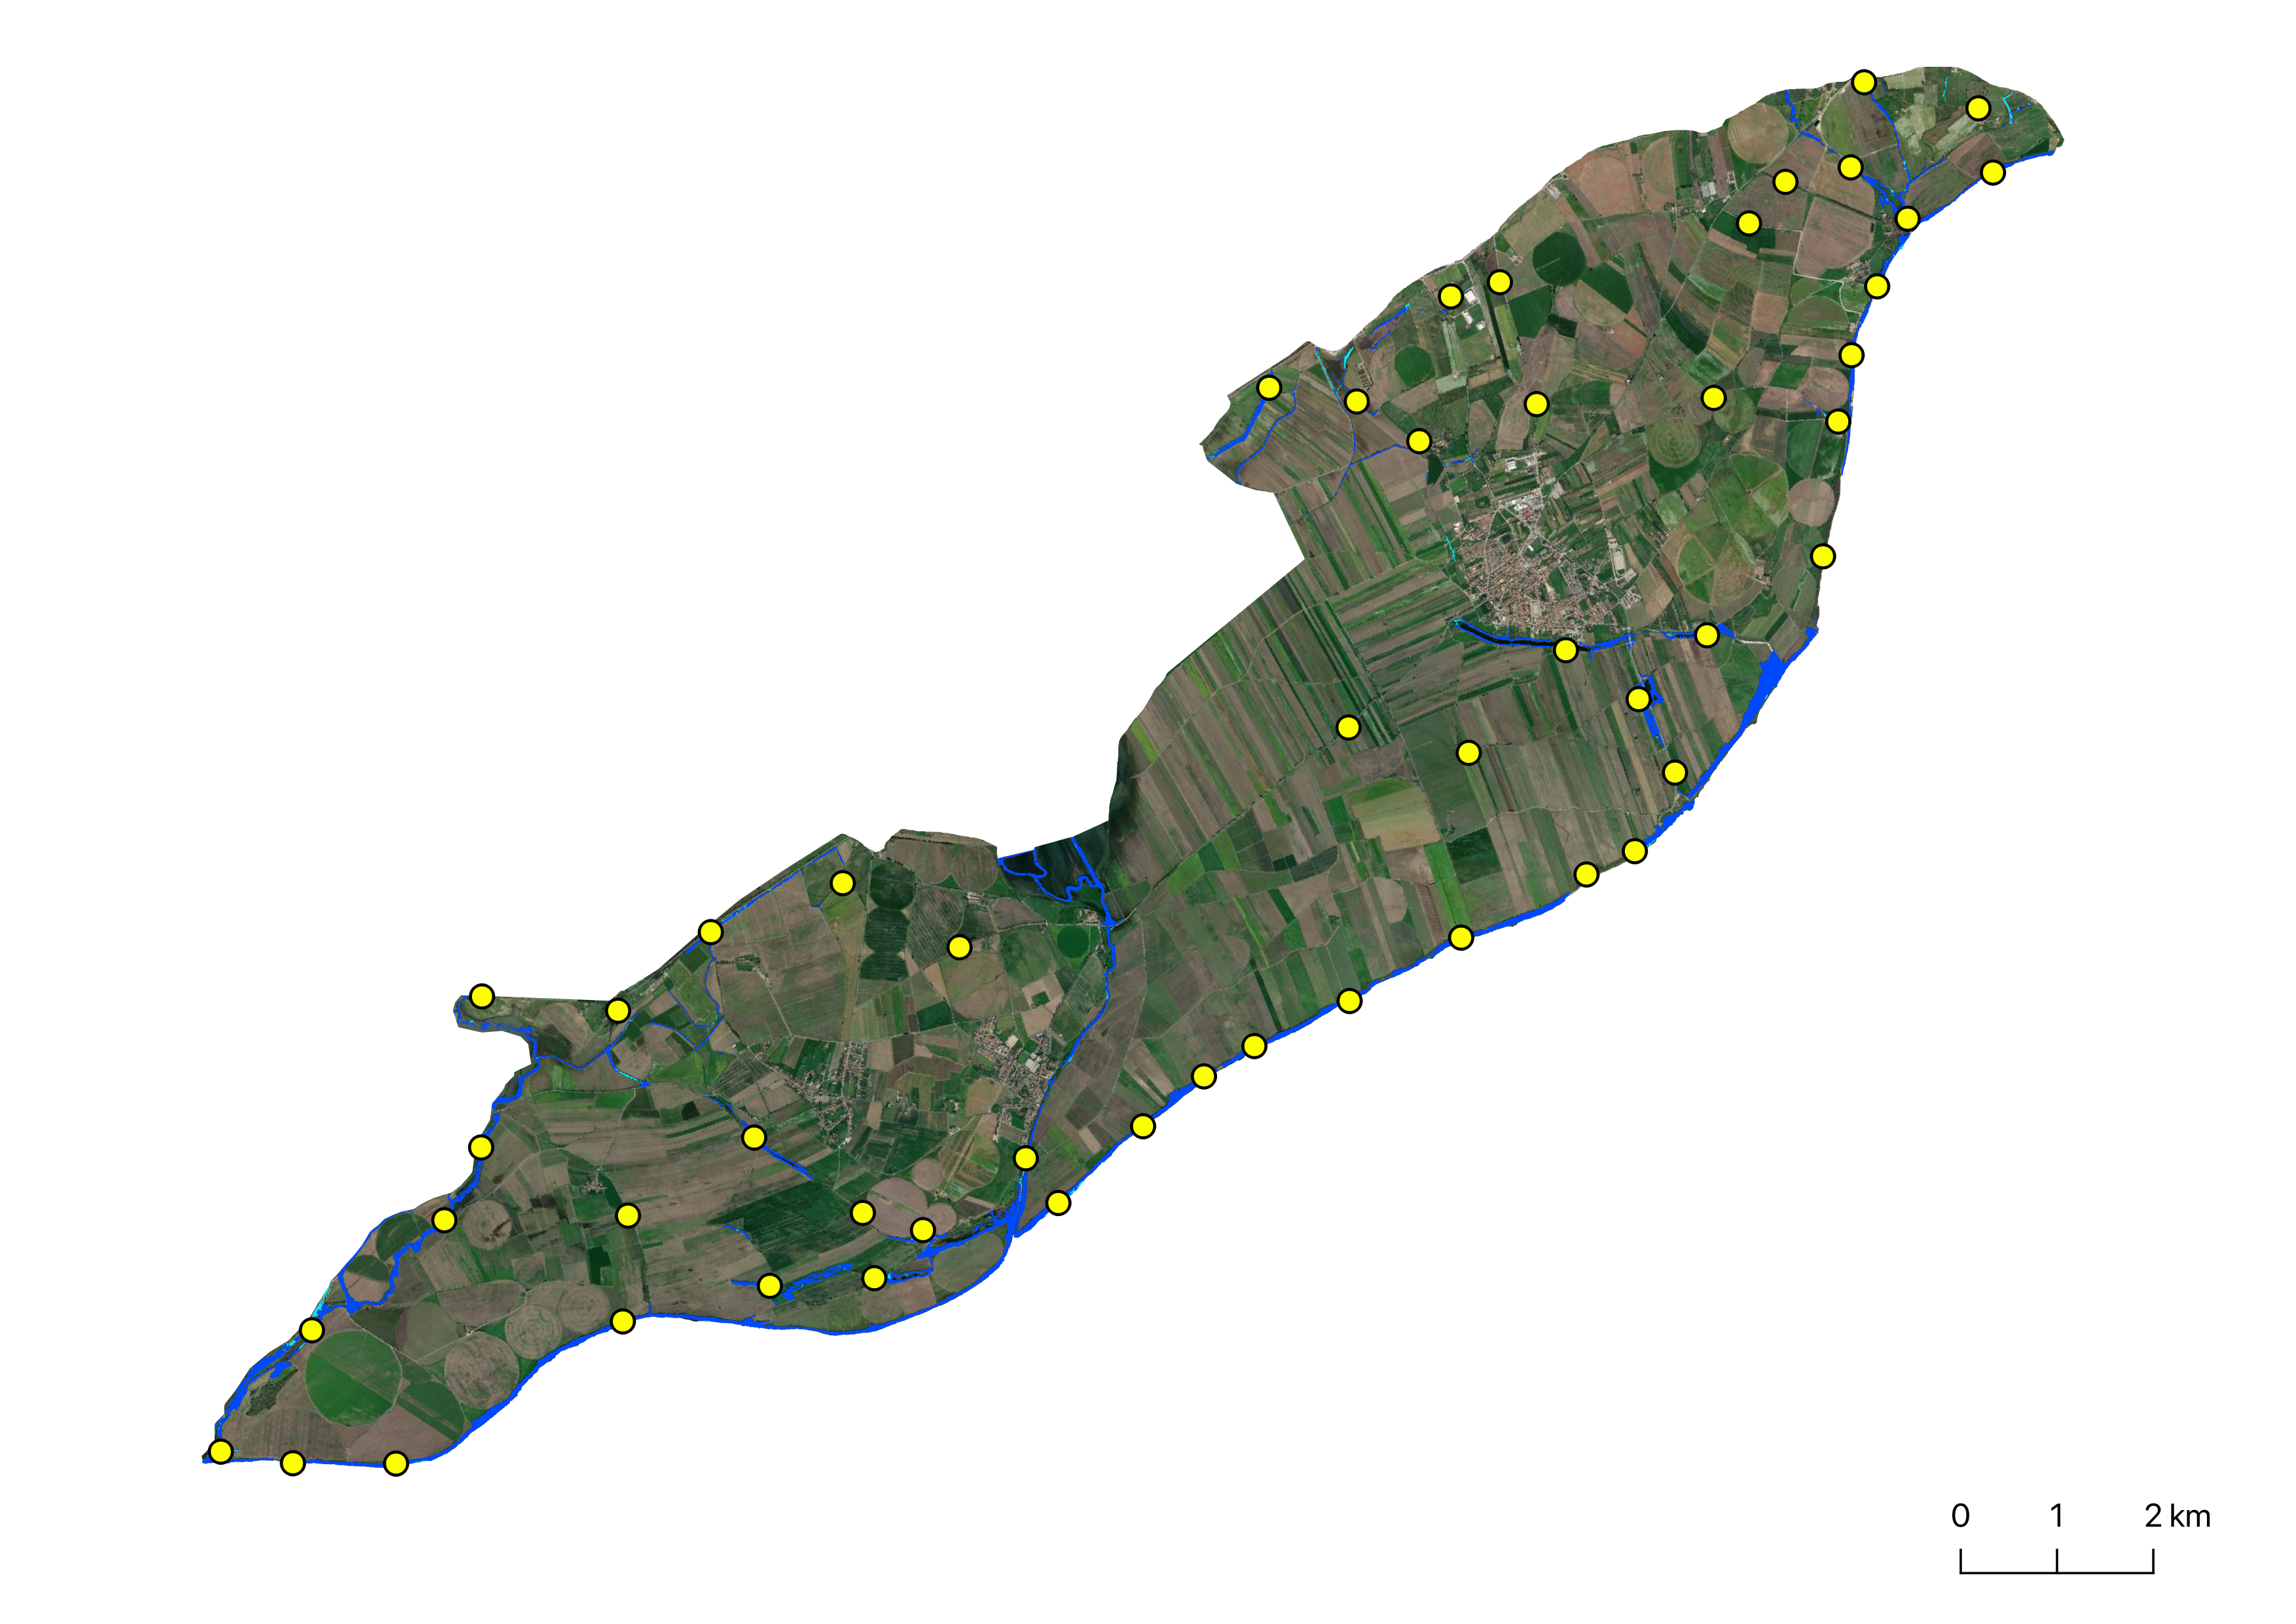

Supplement: s1 [file s1 › Figure S9.tif]
